1 **WNT responsive SUMOylation of ZIC5 exerts multiple effects on transcription**  
2 **to promote murine neural crest cell development**

3

4 Running title: SUMOylation regulates ZIC5

5

6

7 Radiya G. Ali<sup>1</sup>, Helen M. Bellchambers<sup>1,3</sup>, Nicholas Warr<sup>2</sup>, Jehangir N. Ahmed<sup>1</sup>, Kristen S.

8 Barratt<sup>1</sup>, Kieran Neill<sup>1</sup>, Koula E. M. Diamand<sup>1</sup> and Ruth M. Arkell<sup>1, 2, \*</sup>

9

10

11 1: Early Mammalian Development Laboratory, John Curtin School of Medical Research, The  
12 Australian National University, Canberra, ACT 2601, Australia

13 2: Early Development, Mammalian Genetics Unit, MRC Harwell, Oxfordshire, OX110RD, UK

14 3: Present address: Department of Pediatrics, Indiana University School of Medicine,  
15 Indianapolis, IN, USA

16 \*: Author for correspondence ([ruth.arkell@anu.edu.au](mailto:ruth.arkell@anu.edu.au))

17

18

19

20 **Address for correspondence:**

21 Dr Ruth Arkell,

22 John Curtin School of Medical Research

23 The Australian National University

24 Bld131, Garran Road

25 ACTON ACT 2601 AUSTRALIA

26 Phone: +61 (0)2 6125 9158

27 Fax: +61 (0)2 6125 8294

28 Email: [ruth.arkell@anu.edu.au](mailto:ruth.arkell@anu.edu.au)

29

30 Key words: TCF, Foxd3, post-translational modification, transcription factor, co-factor,

31 mouse neural crest cell.

## 32 Summary Statement

33 ZIC5 is SUMOylated in response to WNT signaling which increases ZIC5 transcriptional activation while  
34 reducing ZIC5/TCF co-repression to, overall, promote neural crest specification.

35

## 36 Abstract

37 Zinc finger of the cerebellum (Zic) proteins act as classical transcription factors to promote  
38 transcription of the *Foxd3* gene during neural crest cell specification. Additionally, they can act as co-  
39 factors that bind TCF molecules to repress WNT/ $\beta$ -catenin dependent transcription without contacting  
40 DNA. Here, we show ZIC activity at the neural plate border is influenced by WNT-dependent  
41 SUMOylation. In a high WNT environment, a lysine within the highly conserved ZF-NC domain of ZIC5  
42 is SUMOylated, which decreases formation of the TCF/ZIC co-repressor complex and shifts the balance  
43 towards transcription factor function. The modification is critical *in vivo*, as a ZIC5 SUMO-incompetent  
44 mouse strain exhibits neural crest specification defects. This work reveals the function of the ZIC ZF-  
45 NC domain, provides *in vivo* validation of target protein SUMOylation, and demonstrates that WNT/ $\beta$ -  
46 catenin signalling directs transcription at non-TCF DNA binding sites. Furthermore, it can explain how  
47 WNT signals convert a broad domain of *Zic* ectodermal expression into a restricted domain of neural  
48 crest cell specification.

49

## 50 Introduction

51 The neural crest is a transitory population of multi-potent cells that arises during gastrulation.  
52 Inductive signals from various growth factors, including WNTs, establish the neural plate border (NPB)  
53 at the juncture of the neural and non-neural ectoderm. The NPB contains the prospective neural crest  
54 and expresses multiple transcription factors, including members of the *Zic* gene family (Stuhlmiller  
55 and García-Castro, 2012; Bronner and Simões-Costa, 2016; Rogers and Nie, 2018; York and McCauley,  
56 2020). These transcription factors, in response to sustained WNT signals, cooperate to direct the  
57 expression of a second set of transcription factors, known as neural crest specifier genes, including  
58 *Foxd3*. In chick embryos, ZIC1 binds to and promotes expression from a conserved enhancer element  
59 containing a Zic responsive element (ZRE) upstream of the *FOXD3* gene (Simões-Costa *et al.*, 2012). In  
60 mouse embryos, *Zic1* is not expressed during neural crest cell (NCC) induction (Elms *et al.*, 2004), but  
61 three closely related genes are: *Zic2*, *Zic3* and *Zic5* (Furushima *et al.*, 2000; Elms *et al.*, 2004). Mouse  
62 embryos that lack either functioning ZIC2 or ZIC5 protein have depleted neural crest production (Elms  
63 *et al.*, 2003; Inoue *et al.*, 2004); thus these genes likely encode putative endogenous murine *Foxd3*  
64 expression regulators.

65

66

67 ZIC proteins can also act as co-factors. For example, Zic family members have been shown to bind TCF  
68 proteins (Pourebahim *et al.*, 2011; Fujimi, Hatayama and Aruga, 2012; Zhao *et al.*, 2019) and inhibit  
69  $\beta$ -catenin/TCF mediated transcription at WNT responsive elements (WREs) stimulated by canonical  
70 WNT signalling (Pourebahim *et al.*, 2011; Fujimi, Hatayama and Aruga, 2012). In a low WNT  
71 environment (i.e. when  $\beta$ -catenin protein is degraded by the  $\beta$ -catenin destruction complex), WREs  
72 are often repressed by transcriptional mediators from the TCF/LEF family in concert with co-  
73 repressors, the best studied of which are members of the TLE family of Groucho related co-repressors  
74 (Ramakrishnan *et al.*, 2018). ZIC proteins can also interact with TCF proteins to function as co-  
75 repressors (without contacting the DNA at WREs) in cultured mammalian cells, and in *Xenopus* and  
76 zebrafish embryos (Pourebahim *et al.*, 2011; Fujimi, Hatayama and Aruga, 2012; Zhao *et al.*, 2019).  
77 Upon WNT stimulation and nuclear import of  $\beta$ -catenin (as occurs at the NPB; Ferrer-Vaquer *et al.*,  
78 2010), the repressor complex on a WRE is converted to a TCF/ $\beta$ -catenin activation complex (Gammons  
79 and Bienz, 2018). Exactly how the various molecular functions of ZIC proteins are controlled to ensure  
80 the timely activation of the neural crest specifier genes in a high WNT environment is unknown (Ali,  
81 Bellchambers and Arkell, 2012; Houtmeyers *et al.*, 2013).

82

83 One mechanism by which protein activities are dynamically regulated is via post translational  
84 modification (PTM). SUMOylation, in which the SUMO (Small Ubiquitin-like Modifier) protein is  
85 reversibly attached to specific lysine residues of target proteins, tends to alter the interaction of its  
86 target substrates with other proteins or DNA. It can do this by enhancing or blocking interaction sites  
87 or by inducing conformational change in the target protein (Henley, Craig and Wilkinson, 2014;  
88 Hendriks and Vertegaal, 2016; Han *et al.*, 2018). Additionally, once SUMOylated, the protein may be  
89 targeted by SUMO-targeted ubiquitin ligases that specifically recognise and ubiquitylate SUMOylated  
90 proteins. Thus, SUMO conjugation to a target protein can result in a range of functional changes  
91 (altered DNA binding, protein-protein interactions, subcellular localisation or protein stability) (Wei,  
92 Schöler and Atchison, 2007; Kim, Chia and Costantini, 2008; Choi *et al.*, 2011; Chen *et al.*, 2013). The  
93 SUMOylation cycle, in which SUMO is matured, activated and passed to the conjugating enzyme and  
94 then (in combination with an E3 ligase) is conjugated to a target lysine in a substrate protein, differs  
95 slightly from that of ubiquitylation. For example, though mammalian cells express at least three  
96 different SUMO protein isoforms (SUMO1-3), there is only one SUMO conjugating enzyme (UBC9) and  
97 it plays a role in target specificity by binding to a SUMOylation consensus site in proteins. However,  
98 this binding is relatively weak and SUMOylation of most substrates is inefficient in *in vitro* reactions  
99 lacking the appropriate E3 ligase (Jakobs *et al.*, 2007; Varejão *et al.*, 2020). *Ubc9* is expressed

100 specifically at the NPB in chick embryos and its depletion downregulates the expression of NCC  
101 specifier transcription factors (Luan *et al.*, 2013), demonstrating that this PTM is essential for timely  
102 NCC development in the chick. Additionally, SUMOylation of the NPB transcription factor PAX7 in chick  
103 embryos (Luan *et al.*, 2013) and of the NCC specifier transcription factors Sox9 and Sox10 in *Xenopus*  
104 and chick embryos (Taylor and LaBonne, 2005; Liu *et al.*, 2013) influences NCC development. Little is  
105 known, however, about the role of SUMOylation in mammalian neural crest specification.

106

107 Here, we investigate SUMOylation of the multifunctional transcription regulator ZIC5 and explore the  
108 functional consequences of ZIC dependent SUMOylation in cells, at the murine NPB and in varying  
109 WNT environments. We report that ZIC5 is poly-SUMOylated at a deeply conserved lysine and that  
110 conservative substitution of this single lysine with a non-modifiable arginine residue disrupts NCC  
111 development during murine embryogenesis. Cell-based investigations of the functional consequence  
112 of ZIC5 SUMOylation demonstrate that SUMOylation decreases co-repressor activity and potentiates  
113 the trans-activation ability of ZIC5, including at the ZIC responsive element in a *Foxd3* enhancer.  
114 Moreover, we find that stimulation of the canonical WNT pathway increases the proportion of the  
115 ZIC5 protein that is SUMOylated and that, in this high WNT environment, ZIC5 co-repression of WREs  
116 is diminished. This SUMOylation driven, bi-phasic response of ZIC5 to WNT signalling can theoretically  
117 influence transcription at both WREs and ZREs. It also provides a conceptual basis to explain the fact  
118 that NCC specification occurs in one region within a broad neuroectodermal domain of ZIC expression:  
119 high concentration canonical WNT signals at the NPB convert ZIC and TCF proteins into transactivators,  
120 whereas repression at WREs persists in the future lateral neuroectoderm.

121

## 122 Results

### 123 **ZIC5 is a target of the post-translational modification SUMOylation**

124 To investigate the molecular mechanism regulating the balance between ZIC transcription factor and  
125 co-factor abilities, we focused on a small (14-21 aa in size), highly conserved, but functionally  
126 uncharacterised domain located immediately N-terminal of the zinc finger domain in each of the  
127 vertebrate Zic proteins, termed the Zinc Finger N-terminally Conserved domain (ZF-NC) (Aruga *et al.*,  
128 2006). Analysis of the human ZF-NC region of ZIC1-5 identified a high probability consensus  
129 SUMOylation motif (Gareau and Lima, 2010) at the C-terminus of the domain (Figs. 1A and S1, Motif  
130 1). This same motif was previously identified as a bona-fide SUMOylation site in the ZIC3 protein (Chen  
131 *et al.* 2013). Further investigation revealed that a subset of ZIC proteins (ZIC1, 3, 5) contain a second  
132 consensus SUMOylation motif located at the zinc finger 3 and 4 boundary (Fig. 1A and S1, Motif 2) and

133 a third consensus close to the N-terminal of ZIC5 that is not conserved in other Zic family members  
134 (Fig. 1A, Motif 3).

135

136 To determine whether the ZICs motifs are *bona fide* SUMOylation targets, we assessed whether one  
137 member of the ZIC family, ZIC5, can be SUMOylated by SUMO1 using the cell-based UBC9-fusion-  
138 directed SUMOylation system (UFDS) (Jakobs *et al.*, 2007). The direct fusion of UBC9 to the target  
139 protein catalyses SUMO E3 ligase-independent SUMOylation, avoiding the need for target specific  
140 endogenous ligases (Jakobs *et al.*, 2007). HEK293T cells transiently expressing V5 epitope-tagged wild-  
141 type human ZIC5 fused to UBC9 (V5-UBC9-ZIC5-WT) alone or with either EmGFP-tagged wild-type  
142 SUMO1 (EmGFP-SUMO1-WT) or a SUMOylation-defective SUMO1 mutant (EmGFP-SUMO1-ΔGG)  
143 (Kamitani, Nguyen and Yeh, 1997) were lysed and subjected to SDS-PAGE and western blotting (WB).  
144 When V5-UBC9-ZIC5-WT and EmGFP-SUMO1-WT were co-expressed, additional heavier (~200 and  
145 280 kDa) molecular weight (MW) bands of V5-UBC9-ZIC5-WT (base MW of ~120 kDa) were detected  
146 (Fig. 1B). These bands were not detected in the absence of EmGFP-SUMO1-WT or the presence of  
147 EmGFP-SUMO1-ΔGG, suggesting V5-UBC9-ZIC5-WT can be SUMOylated (Fig. 1B,C). To corroborate  
148 this finding, the behaviour of transiently expressed V5 epitope-tagged wild-type ZIC5 (V5-ZIC5-WT) in  
149 the absence or presence of EmGFP-SUMO1-WT or EmGFP-SUMO-ΔGG in HEK293T cells was  
150 compared. As before, an additional heavier MW band (~180 kDa) of V5-ZIC5-WT (base MW of ~100  
151 kDa) was only observed in EmGFP-SUMO1-WT expressing cells (Fig. 1D).

152

153 The increase in the MW of exogenously expressed V5-ZIC5-WT (by ~80 kDa; Fig. 1D) is consistent with  
154 the addition of two EmGFP-SUMO1-WT molecules and suggests that ZIC5 is either multi-mono-  
155 SUMOylated (single SUMO conjugated at multiple sites) or poly-SUMOylated (a chain of SUMO  
156 molecules at a site; Gocke, Yu and Kang, 2005). To clarify this and identify genuine SUMOylation motifs  
157 within ZIC5, V5-tagged ZIC5 mutant constructs with a lysine (K) to arginine (R) mutation in either Motif  
158 1 (V5-ZIC5-K393R) or Motif 2 (V5-ZIC5-K522R) were expressed in the presence or absence of EmGFP-  
159 SUMO1-WT. No increased MW band of V5-ZIC5-K393R was observed when co-expressed with EmGFP-  
160 SUMO1-WT (Fig. 1D), whereas V5-ZIC5-K522R was no different to wild-type (data not shown),  
161 indicating that K393 is the sole site of SUMO attachment and that K393R prevents SUMOylation. Even  
162 when the UFDS system was employed, mutation of Motif 2 or Motif 3 showed no evidence of affecting  
163 the PTM of ZIC5 (Fig. 1C).

164

165 SUMOylated proteins are reported to co-localise with SUMO1 foci or nuclear bodies (NB) that are  
166 thought to be sites of active SUMOylation (Navascués *et al.*, 2007; de Cristofaro *et al.*, 2009;

167 Lallemand-Breitenbach and de Thé, 2018); inhibition of SUMOylation may therefore be expected to  
168 decrease the extent of co-localisation. Thus, to further validate our WB results we measured the  
169 proportion of EmGFP-SUMO1-WT foci that are enriched for exogenously expressed wild-type or  
170 mutant ZIC5 (Fig. 1E,F) in the nucleus of HEK293T cells. The co-localisation of EmGFP-SUMO1-WT with  
171 V5-ZIC5-K393R (35.1%, S.E. 2.89%) showed a statistically significant decrease compared to V5-ZIC5-  
172 WT (46.9% S.E. 2.12%;  $p < 0.001$ ), whilst V5-ZIC5-K522R showed no significant difference from V5-ZIC5-  
173 WT (51%, S.E. 3.52%). Although significantly reduced, the K393R mutation did not ablate co-  
174 localisation with SUMO1. Extrapolating from the observations of Gocke *et al.* (2005), we speculate  
175 that only a small fraction of the V5-ZIC5-WT in SUMO1 NB is SUMOylated at a given time and that  
176 localisation in these SUMO1 enriched zones might aid rapid SUMOylation of ZIC5 in response to  
177 cellular cues. Taken together, these data demonstrate that ZIC5 is poly-SUMOylated at a single  
178 SUMOylation motif (Motif 1, K393R) (Fig. 1G). Additionally, the sequence homology within the ZIC ZF-  
179 NC suggests that all human ZICs may be SUMOylated at Motif 1.

180

### 181 **ZIC5 SUMOylation is critical *in vivo* to drive neural crest specification**

182 To determine if SUMOylation alters ZIC5 function *in vivo*, denaturing HPLC was used to screen a  
183 genomic DNA library of ENU mutagenised BALB/c mice (Coghill *et al.*, 2002) for a mouse strain in which  
184 ZIC5 could not be SUMOylated. Thus, a genome was identified with an A to G transition in exon 1 of  
185 murine *Zic5* at position 1429 (NM\_022987.3) that resulted in a K363R mutation within the ZIC5 ZF-NC  
186 (ZIC5 K363R) (Fig. 2A,B). The resulting allele was named kiska (*Ki*) and recovered from the frozen sperm  
187 archive. To uncover the effect of the mutation on ZIC5 function, the new allele was compared to an  
188 existing *Zic5* null line (*Zic5*<sup>-/-</sup>). Consistent with previous reports of *Zic5*<sup>-/-</sup> mice (Inoue *et al.*, 2004), a  
189 proportion of *Zic5*<sup>-/+</sup> animals developed hydrocephaly post-birth (5%, N=54; Fig. 2C). Additionally, it  
190 was observed that a proportion of *Zic5*<sup>-/+</sup> animals (13%, N=123) exhibited a ventral spot (Fig. 2D),  
191 indicative of trunk NCC hypoplasia, which is consistent with previous reports that insufficient NCCs  
192 arise in *Zic5*<sup>-/-</sup> embryos (Inoue *et al.*, 2004) and serves as a marker of trunk NCC depletion. *Zic5*<sup>Ki/+</sup> mice  
193 also presented with a ventral spot (3%, N=73), although at a lower rate than the heterozygous nulls,  
194 suggesting that the mutation produces a hypomorphic allele. This was confirmed by placing the *Zic5*  
195 *Ki* allele in *trans* to the null. Mice of the genotype *Zic5*<sup>Ki/-</sup> exhibited increased penetrance of the ventral  
196 spot (29%, N=21,  $p < 0.05$  G-test) relative to the heterozygous null allele, as predicted for a  
197 hypomorphic allele. These results, in which SUMO-incompetent (i.e. unmodified) ZIC5 is sufficient to  
198 ameliorate but not fully rescue the null phenotype, indicate that the SUMOylated form of ZIC5 is  
199 critical during NCC development.

200

201 To better understand the role of ZIC5 SUMOylation in neural crest development, the expression of the  
202 neural crest specifier gene *Foxd3* was examined in embryos that lack ZIC5 (*Zic5*<sup>-/-</sup>) and those in which  
203 the SUMO-incompetent form of ZIC5 is present (*Zic5*<sup>Ki/Ki</sup>). Embryos expressing only the SUMO-  
204 incompetent form of ZIC5 have substantially depleted *Foxd3* expression (Fig. 2E), demonstrating that  
205 K363 modification is essential for the optimal transcription factor activity of ZIC5. The level of *Foxd3*  
206 expression is further depleted in embryos trans-heterozygous for the two alleles (*Zic5*<sup>Ki/-</sup>) or those that  
207 lack *Zic5* (*Zic5*<sup>-/-</sup>; Fig. 2E), indicating that the SUMO-incompetent form of ZIC5 retains some  
208 transactivation ability.

209

### 210 **SUMOylation promotes the transcriptional ability of ZIC5 at ZIC responsive elements**

211 To understand how SUMOylation influences human ZIC5 function, cell based assays of ZIC  
212 transcription factor, co-factor and macro-molecular activity were employed. First, the consequence of  
213 ZIC5 SUMOylation for transactivation was assayed using an established *APOE*:Luc2 reporter assay  
214 (Ahmed *et al.*, 2020) which is based upon an initial observation by Salero *et al.* (2001) that ZIC1 and  
215 ZIC2 proteins are able to stimulate transcription via a genomic fragment from the human *APOE*  
216 promoter. The ZIC5 protein is also able to transactivate this promoter fragment in HEK293T cells,  
217 whereas a form of ZIC5 with a mutation within the DNA-binding domain V5-ZIC5-C528S is not (Ahmed  
218 *et al.*, 2020). These results are independently reproduced here. Additionally, a plasmid IP approach  
219 was used to verify that the V5-ZIC5-C528S protein does not interact with the *APOE* promoter fragment,  
220 thus confirming that ZIC5 transactivation of the *APOE* promoter in this assay is dependent upon DNA  
221 interaction (Fig. S2A, A', B). When HEK293T cells were transiently transfected with the *APOE*:Luc2  
222 reporter and the SUMO-incompetent V5-ZIC5-K393R, the transactivation of the promoter fragment  
223 was significantly reduced (but not ablated) relative to that stimulated by V5-ZIC5-WT (Fig. 3A, A';  
224  $p < 0.05$ ). Moreover, when SUMOylation of wild-type ZIC5 protein was prevented (by inhibition of  
225 universal SUMOylation via co-expression of a dominant negative form of UBC9; Flag-UBC9-C93S  
226 (Poukka *et al.*, 1999)) the transactivation ability of V5-ZIC5-WT was reduced to the level of V5-ZIC5-  
227 K393R (Fig. 3B, B'). The results indicate that SUMOylation of ZIC5 at K393 is necessary to drive maximal  
228 transactivation of the *APOE* promoter in HEK293T cells.

229

230 To determine whether the same mechanism may contribute to the decreased *Foxd3* expression  
231 observed in the *Ki* SUMO-incompetent mouse strain (Fig. 2E), this set of experiments were repeated  
232 using a recently generated *Foxd3*:Luc2 reporter assay (Ahmed *et al.*, 2020). This construct incorporates  
233 the mouse genomic region equivalent to the recently identified ZIC responsive chick *Foxd3* enhancer  
234 (Simões-Costa *et al.*, 2012). The wild-type ZIC5 protein is able to transactivate this promoter fragment  
235 in HEK293T cells, whereas a form of ZIC5 with a mutation within the DNA-binding domain V5-ZIC5-

236 C528S is not (Ahmed *et al.*, 2020). These results are independently reproduced here. Additionally, a  
237 plasmid IP approach was used to verify that the V5-ZIC5-C528S protein does not interact with the  
238 *Foxd3* enhancer fragment, thus confirming that ZIC5 transactivation of the *Foxd3* element in this assay  
239 is dependent upon DNA interaction (Fig. S2C, C', D). Luciferase assays with the *Foxd3*:Luc2 reporter in  
240 which SUMOylation of ZIC5-K393 was inhibited specifically (via K393R substitution) or universally (via  
241 co-expression of Flag-UBC9-C93S) recapitulated the results obtained with the *APOE*:Luc2 reporter (Fig.  
242 3C, C', D, D';  $p < 0.05$ ). The data indicate that SUMOylation at K393 is necessary to maximise  
243 transactivation of the *Foxd3* enhancer element. To evaluate the role of TCF7L2 in *Foxd3* expression,  
244 TCF7L2 was expressed alone or in conjunction with wild-type ZIC5. In contrast, the co-expression of  
245 FLAG-TCF7L2 with V5-ZIC5-WT did not increase transactivation of the *Foxd3*:Luc2 reporter (Fig. S2E),  
246 suggesting TCF does not co-operate with mammalian ZIC protein at ZREs and indicates a specific  
247 requirement for ZIC5 SUMOylation.

248

#### 249 **SUMOylation decreases ZIC5 co-inhibition of WNT signalling**

250 To examine the effect of ZIC5 SUMOylation on co-factor activity, the ability of ZIC5 and ZIC5-K393R to  
251 inhibit WNT/ $\beta$ -catenin dependent transcription was examined by a TOPflash reporter assay that  
252 specifically measures  $\beta$ -catenin/TCF mediated transcription (Korinek *et al.*, 1997). As shown in Fig.  
253 S3A, A' when this assay is conducted in HEK293T cells using our standard protocols, transfection of  
254 V5- $\beta$ -CATENIN stimulates expression from the TOPflash but not the control FOPflash reporter, and co-  
255 transfection with the V5-ZIC5-WT expression vector inhibits expression from the TOPflash (but does  
256 not alter expression from the FOPflash) reporter. To evaluate the influence of SUMOylation on ZIC5-  
257 mediated WNT inhibition, SUMOylation was inhibited either specifically (via expression of the SUMO-  
258 incompetent V5-ZIC5-K393R construct; Fig. 3E, E') or globally (via co-expression of Flag-UBC9-C93S  
259 with V5-ZIC5-WT; Fig. 3F, F'). Overexpression of V5-ZIC5-K393R significantly enhanced suppression of  
260  $\beta$ -catenin stimulated transcription relative to V5-ZIC5-WT ( $p < 0.05$ ) and the presence of dominant  
261 negative UBC9 converted V5-ZIC5-WT to a more efficient inhibitor of  $\beta$ -catenin mediated  
262 transcription. Together these assays indicate that the unmodified form of ZIC5 is required for optimal  
263 co-factor activity and that SUMOylation decreases the co-factor activity of ZIC5.

264

#### 265 **SUMOylation reduces formation of the ZIC5/TCF repression complex**

266 SUMOylation is known to alter macro-molecular interactions (Geiss-Friedlander and Melchior, 2007;  
267 Flotho and Melchior, 2013; Matunis and Rodriguez, 2016). The possibility that K393 SUMOylation  
268 affects the previously characterised ZIC/TCF interaction (Pourebahim *et al.*, 2011; Fujimi, Hatayama  
269 and Aruga, 2012) was considered a potential cause of the SUMOylation induced change in ZIC5  
270 behaviour (i.e. from inhibition at WREs towards transactivation at ZREs). The physical interaction



271 between TCF7L2/ZIC5-WT and between TCF7L2/ZIC5-K393R was examined via bimolecular  
272 fluorescence complementation (BiFC) assay (Kodama and Hu, 2012) using a split Venus fluorescent  
273 molecule (V1 and V2). As shown in Fig. 3G, the SUMO-incompetent form of ZIC5 (V1-ZIC5-K393R)  
274 exhibited increased interaction with TCF7L2 (V2-TCF7L2) relative to ZIC5-WT (V1-ZIC5-WT). This  
275 interaction was validated through a BiFC competition assay where wild-type ZIC5 protein without the  
276 V1 tag competes with V1-ZIC5, indicating a specific interaction (Fig. S3B). This is consistent with both  
277 the improved ability of V5-ZIC5-K393R to inhibit  $\beta$ -catenin/TCF mediated transcription and the  
278 decreased ability of V5-ZIC5-K393R to drive expression at ZREs. In contrast, our experiments found no  
279 support for the alternative possibility that SUMOylation altered ZIC5 subcellular localisation (Fig. S4A-  
280 C). As lysine residues can be the target of PTMs other than SUMOylation, the ability of K393 to undergo  
281 ubiquitylation was assessed using an Ubiquitin-based BiFC assay to further explore the possibility that  
282 another K393 PTM is responsible for the observed effects on ZIC5 transcriptional control. Although  
283 ZIC5 was found to be ubiquitinated, K393 is not a target lysine (Fig. S4D).

284

#### 285 **The proportion of SUMOylated ZIC5 protein varies with the strength of canonical WNT signal**

286 If, as indicated by the TOPflash and BiFC assays, SUMOylation drives the demise of the TCF/ZIC  
287 repressor complex, then it may be expected that the proportion of ZIC5 that is SUMOylated varies  
288 with the strength of WNT signal. To test this possibility, the proportion of SUMOylated ZIC5 was  
289 compared in HEK293T cells in their basal state and in the presence of the GSK3 (a core component of  
290 the WNT signalling network) inhibitor LiCl. As shown in Figs. 4A, A' and S5A, activation of WNT  
291 signalling via LiCl caused an increase in the proportion of SUMOylated ZIC5. A TOPflash assay  
292 confirmed that the LiCl treatment increased WNT/ $\beta$ -catenin-mediated transcription as expected (Fig.  
293 S5B). Additionally, hyper-stimulation of WNT signalling via LiCl decreased the ability of V5-ZIC-WT to  
294 inhibit WNT/ $\beta$ -catenin-mediated transcription in a time dependent manner (Fig. 4B). This indicates  
295 that as WNT signalling activity increases (and the proportion of SUMOylated ZIC5 increases) the ability  
296 of ZIC5 to inhibit TCF-dependent transcription decreases. Together these experiments confirm WNT  
297 signalling-dependent ZIC5 SUMOylation results in a shift in ZIC5's transcription regulation function  
298 from inhibitory co-factor at WREs to transcriptional activator at ZREs.

299

#### 300 **Discussion**

301 This study shows that the multifunctional transcription regulator, ZIC5, is a SUMO substrate, being  
302 poly-SUMOylated at a conserved lysine residue within the ZF-NC domain (K393). The SUMOylation  
303 state of ZIC5 shifts the balance of ZIC5 function: increased SUMOylation correlates with a decreased  
304 propensity to interact with TCF and repress WREs and an increase in transactivation at ZREs.  
305 Additionally, elevated canonical WNT signalling is associated with a higher proportion of SUMOylated

306 ZIC5 protein and a decrease in the ability of ZIC5 to inhibit transcription at WREs. The results of the  
307 cell-based assays are synthesized in a working model (Fig. 5) that illustrates how a high canonical WNT  
308 environment and demise of the ZIC/TCF repressor complex can facilitate transactivation at both WREs  
309 and ZREs. The *Ki* mouse strain, in which the conserved lysine within the ZF-NC cannot be SUMOylated,  
310 exhibits the same phenotype as the complete loss of the ZIC5 protein, albeit in a less severe/frequent  
311 manner. When placed in *trans* to the null allele, the phenotype is further enhanced, indicating that *Ki*  
312 is a partial loss-of-function allele. This demonstrates that basal ZIC5 is insufficient to fully perform the  
313 activities of the ZIC5 protein and that PTM of this conserved lysine is required *in vivo*. The work also  
314 provides a direct demonstration that PTM of this residue is necessary to drive optimal *Foxd3*  
315 expression and NCC specification.

316

317 SUMOylation is a dynamic and reversible PTM that occurs at a lysine residue found within a consensus  
318 protein sequence (Han *et al.*, 2018). All mammalian ZIC proteins contain at least one such consensus  
319 sequence immediately N-terminal of the zinc finger domain. The deep conservation of this ZIC protein  
320 region has been highlighted in multiple phylogenetic ZIC analyses (Aruga *et al.*, 2006; Tohmonda *et*  
321 *al.*, 2018), but its functional significance remains unknown. Here we show that ZIC5 can be  
322 SUMOylated at K393 in HEK293T cells and that conservative substitution of this lysine residue with  
323 the SUMO-incompetent arginine residue is sufficient to prevent all ZIC5 SUMOylation (Fig. 1D). In  
324 contrast, individual mutation of the two other ZIC5 high probability SUMO target lysines does not alter  
325 the pattern of SUMO-dependent protein products (Fig. 1C). We conclude that K393 is the sole *in vivo*  
326 target of SUMO and furthermore that, based on the size of the dominant SUMO-dependent products,  
327 ZIC5 is poly-SUMOylated at K393. Our conclusion is supported by high throughput proteomic studies  
328 which have identified ZIC5 as a SUMO substrate (but which did not identify the target lysine residue)  
329 (Hendriks and Vertegaal, 2016). Our finding also extends the work of Chen *et al.*, (2013) who  
330 demonstrated that the paralogous lysine within human ZIC3 (K248) can be SUMOylated in HeLa cells.

331

332 When overexpressed in HeLa cells, ZIC3 SUMOylation was found to influence nuclear localisation.  
333 Generally, studies of ZIC sub-cellular distribution report predominate nuclear localisation (Koyabu *et*  
334 *al.*, 2001; Ishiguro *et al.*, 2004; Ware *et al.*, 2004; Brown *et al.*, 2005; Ahmed *et al.*, 2013, 2020), and  
335 preventing ZIC3 SUMOylation leads to diffuse subcellular distribution. In contrast, preventing ZIC5  
336 SUMOylation did not alter its subcellular distribution (Fig. S4A-C). Instead, we found that SUMOylation  
337 decreased interaction with TCF7L2 and ZIC inhibition at WREs as well as increasing trans-activation at  
338 ZREs. The findings further suggest that the common consequence of SUMOylation is to alter protein-  
339 protein interactions. Additionally, we observed that the kinetics of ZIC5 SUMOylation vary with the

340 level of WNT activity (Fig. 4). We speculate that the need to switch between different modes of ZIC  
341 transcription control in response to inductive signals could explain the evolutionary conservation of  
342 the ZF-NC domain. In support of this idea, it is noteworthy that the *C. elegans* single ZIC orthologue  
343 REF-2 lacks both a recognizable ZF-NC domain and consensus SUMOylation site, and exhibits a distinct  
344 mode of operation in which TCF acts as a co-factor to promote expression at ZREs (Morgan *et al.*,  
345 2015). If the ZF-NC conservation is driven by SUMOylation at the conserved lysine within this domain,  
346 we would predict that the other mammalian ZIC proteins are also SUMOylated at the paralagous and  
347 orthologous lysine.

348  
349 ZIC proteins are known to inhibit WNT signalling when overexpressed in cells, and in *Xenopus* and  
350 zebrafish embryos (Pourebahim *et al.*, 2011; Fujimi, Hatayama and Aruga, 2012; Zhao *et al.*, 2019).  
351 Here we show that ZIC5 also inhibits  $\beta$ -catenin/TCF-dependent transcription, measured via TOPflash  
352 assay in HEK293T cells. Strikingly, hyperstimulation of canonical WNT signalling in this assay, via LiCl,  
353 led to a loss of ZIC5 inhibition (Fig. 4B). This implies ZIC inhibition of transcription at WREs is context  
354 dependent: robust in a relatively low WNT environment, but overcome in the presence of sustained  
355 WNT signalling. Given that sustained WNT signalling promotes ZIC5 SUMOylation and that ZIC5  
356 SUMOylation decreases the ZIC5/TCF7L2 interaction and repression at WREs, it is plausible that  
357 SUMOylation contributes to the observed context dependent ZIC5 transcriptional regulation. This is  
358 supported by the fact that TCF7L2 (formerly known as TCF4) can be SUMOylated, and modification  
359 enhances the  $\beta$ -catenin-dependent transcriptional activation of TCF7L2 (Yamamoto *et al.*, 2003). It  
360 identifies another SUMOylated WNT pathway component, further strengthening the observation that  
361 SUMOylation is a core regulator of canonical WNT signalling (Kim, Chia and Costantini, 2008; Choi *et al.*,  
362 2011; Gao, Xiao and Hu, 2014). As shown in Fig. 5, this feature of ZIC/TCF co-repression enables  
363 sustained WNT signalling to direct trans-activation not just at WREs but also at ZREs. The *in vivo*  
364 relevance of this model is demonstrated by the finding that prevention of ZIC5 SUMOylation is  
365 sufficient to decrease *Foxd3* expression, previously shown to require ZIC binding to an upstream  
366 enhancer, during murine NCC specification. Furthermore, cis-regulatory analysis has failed to identify  
367 many WREs critical for expression of neural crest specifiers (Simões-Costa and Bronner, 2015) and the  
368 work presented here demonstrates how canonical WNT signalling can drive NCC specification in the  
369 absence of such WREs.

370  
371 One caveat of the work presented here is that the role of canonical WNT signalling in mouse NCC  
372 specification remains ambiguous. For example, conditional deletion of many candidate WNT genes  
373 does not prevent murine NCC development. It is however possible that this is due to technical reasons

374 relating to the conditional gene deletion strategy most often used in the mouse (Barriga *et al.*, 2015).  
375 Indeed, the use of an alternative *Cre* driver has provided evidence that ectopic WNT signalling drives  
376 NCC development in the murine forebrain (Mašek *et al.*, 2016), demonstrating that WNT signalling is  
377 able to induce murine NCC specification. Our work provides insight into how the putative WNT signals  
378 can restrict the NCC precursor domain within the NPB, despite a broader domain of expression of NCC  
379 specifying transcription factors such as the ZIC genes. High WNT activity at the NPB (Ferrer-Vaquer *et al.*  
380 *et al.*, 2010) will simultaneously convert both ZIC and TCF proteins into transactivators, meaning that  
381 target NCC specifier genes under the control of either a ZRE (such as demonstrated for the *Foxd3*  
382 enhancer; Fig. 3C, C' and Fig. S2E, E') or WRE can be activated. Simultaneously, in the future lateral  
383 neurectoderm (where WNT signals are lower (Ferrer-Vaquer *et al.*, 2010) and ZICs and TCFs are co-  
384 expressed; K.S.B and R.M.A unpublished data), TCF/ZIC co-repression at WREs and low occupancy at  
385 ZREs will persist.

386

387 The work here focused on SUMOylation of ZIC5, driven by the knowledge that SUMOylation appears  
388 important during chick and *Xenopus* NCC development. In chick, the SUMO ligase is expressed  
389 specifically in the neural crest and SUMOylation of the NPB transcription factor *Pax7* is required for  
390 full expression of the specifying transcription factors *Snail2*, *Sox9* and *Foxd3* (Luan *et al.*, 2013).  
391 Additionally, some specifying transcription factors (*Sox9* and *Sox10*) are themselves SUMOylated in  
392 chick and *Xenopus* embryos and it will be of interest to determine whether WNT driven SUMOylation  
393 at the NPB provides a concerted method of directing NCC specification. We are the first to implicate  
394 SUMOylation in mouse neural crest development: we demonstrates a clear requirement for ZIC5 K393  
395 to elicit full expression of *Foxd3* during NCC formation. Additionally, the cell-based assays demonstrate  
396 that SUMOylation of this residue is also required for full expression of *Foxd3* in HEK293T cells. Given  
397 that several studies have described the overlap of SUMO sites with other PTMs (such as ubiquitylation,  
398 acetylation and methylation), it remains possible that some other ZIC5 K393 PTM contributes to the  
399 observed effect in the *Ki* mouse. The most common overlap occurs between ubiquitylation and  
400 SUMOylation (Hendriks and Vertegaal, 2016) and, despite ZIC5 being ubiquitylated, K393 is not an  
401 ubiquitin target (Fig. S4D). Understanding whether other PTM of K393 occurs awaits further  
402 characterisation of ZIC5 PTMs.

403

404 Overall, the data presented here are consistent with a mechanism by which, in a high canonical WNT  
405 environment, PTM of the ZIC5 protein alters the balance between alternative modes of Zic  
406 transcription control *in vitro* and *in vivo*. This mechanism appears important during WNT-induced NCC  
407 specification. Furthermore, the proposed consequence of this, whereby WNT signals alter

408 transcription at elements other than canonical WREs, is potentially of broad significance and may be  
409 used in many other signalling events and pathways. The use of hetero-protein complexes to repress  
410 transcription enables a nuclear store of synthesised, but inactive, transcription factors ready to  
411 regulate transcription in response to dynamic extracellular cues.

412

413

## 414 Figure legends

415 **Figure 1: ZIC5 is SUMOylated at a conserved lysine within the ZF-NC domain.** (A) Alignment of human  
416 ZIC proteins with putative SUMOylated lysines [K] highlighted. Motif 3 is not conserved in ZIC1-4. The  
417 first score for each Motif is computed by SUMOsp and the second by SUMOplot. (B,C) Representative  
418 WB of HEK293T cell nuclear fractions following transfection of V5-tagged UBC9-fused ZIC5 protein in  
419 the presence of the SUMO1 proteins indicated. (B) A series of higher MW products (arrows indicate  
420 bands of ~200 kDa and 280 kDa) are found in the presence of EmGFP-SUMO1-WT but not in the  
421 presence of the  $\Delta$ GG inactive form. (C) Mutation of K393, but not K522 or K4, leads to depletion of the  
422 SUMO1 dependent higher MW products. Arrows indicate bands of ~200 kDa and 280 kDa and missing  
423 bands are indicated by asterisks. (D) WB of HEK293T cell nuclear fractions following transfection of  
424 the V5-tagged ZIC5 proteins in the presence of the SUMO1 proteins. One high molecular weight form  
425 of ZIC5 (arrow; ~200 kDa) is detected in the presence of WT SUMO1 but not in the presence of the  
426  $\Delta$ GG inactive form of SUMO1. The higher molecular form is not detected when K393 is mutated,  
427 indicating K393 is the sole target of ZIC5 SUMOylation. For B-D, n = 3 independent WBs, including  
428 loading control of the anti-V5 blot. WB to show overexpressed EmGFP-SUMO1 protein and  
429 corresponding loading control are at bottom of the panel. (E,F) Immunofluorescence analysis of ZIC5  
430 and SUMO1 co-localisation of V5-ZIC5 ( $\alpha$ -V5, red) and GFP-SUMO ( $\alpha$ -GFP, green) in nuclear foci of  
431 transfected HEK293T cells. (E) Representative images, arrows indicate points of co-localisation. (F)  
432 Percentage of SUMO foci enriched for ZIC5. Pooled data from two independent experiments. Error  
433 bars = SE (regression analysis) \*:  $p < 0.001$ . (G) Schematic of ZIC5 showing location of SUMO  
434 attachment.

435

## 436 **Figure 2: The K363R (kiska; *Ki*) hypomorphic allele of *Zic5* leads to hypoplasia of trunk neural crest.**

437 (A) Denturing HPLC trace of the mutation-containing amplicon from pooled genomic DNA of four  
438 individual animals. (B) Sequence trace of wild-type and homozygous K363R animals, showing the A to  
439 G transition (arrow) at position 1429 of *Zic5* (of NM\_022987.3). (C) Lateral view of *Zic5* mutant animal  
440 with hydrocephaly which was detected at low frequency in *Zic5*<sup>-/+</sup> and *Zic5*<sup>Ki/-</sup> animals. (D) Ventral view

441 of *Zic5* mutant animal showing a ventral spot which was detected at low frequency in mice of the  
442 genotypes *Zic5*<sup>-/+</sup>, *Zic5*<sup>Ki/+</sup> and *Zic5*<sup>Ki/-</sup>. (E) Dorsal view of intact 8 somite-stage embryos following  
443 WMISH to *Foxd3* (anterior to the top). Arrow indicates posterior limit of trunk neural crest *Foxd3*  
444 expression. Embryos of the genotypes *Zic5*<sup>Ki/+</sup>, *Zic5*<sup>-/+</sup> and *Zic5*<sup>Ki/Ki</sup> have reduced *Foxd3* expression and  
445 embryos of the genotypes *Zic5*<sup>Ki/-</sup> and *Zic5*<sup>-/-</sup> have ablated *Foxd3* expression compared to stage-  
446 matched wild-type (*Zic5*<sup>+/+</sup>) embryos. A minimum of four staged matched embryos per genotype were  
447 compared to precisely staged matched litter mates.

448

449 **Figure 3: SUMOylation alters ZIC5 gene regulation activity and macro-molecular interaction. (A –F’)**

450 Luciferase reporter activity in HEK293T cells with the reporter and expression constructs indicated. (A  
451 and A’) The K393R SUMO-incompetent form of ZIC5 shows a significant decrease in transactivation  
452 ability compared to wild-type ZIC5. (B and B’) The transactivation ability of wild-type ZIC5 is impeded  
453 when SUMOylation is universally inhibited by UBC9-C39S and is equivalent to the SUMO-incompetent  
454 form of ZIC5. (C and C’) The K393R SUMO-incompetent form of ZIC5 shows a significant decrease in  
455 transactivation ability. (D and D’) The transactivation ability of wild-type ZIC5 is impeded by universal  
456 SUMOylation inhibition via UBC9-C39S and is equivalent to that of the SUMO-incompetent form of  
457 ZIC5. (E and E’) The K393R SUMO-incompetent form of ZIC5 shows a significant increase in inhibition  
458 of  $\beta$ -catenin mediated transcription relative to that obtained with wild-type ZIC5. (F and F’) The ability  
459 of wild-type ZIC5 to inhibit  $\beta$ -catenin mediated transcription is increased to a level equivalent to that  
460 of the K393R SUMO-incompetent form. (G and G’) BiFC assay in HEK293T cells. The K393R SUMO-  
461 incompetent form of ZIC5 shows increased interaction with TCF7L2 relative to the wild-type form of  
462 ZIC5. (A-G) Raw data and WB to show overexpressed proteins from one representative experiment.  
463 Error bars = SD from three internal repeats. (A’-G’) Pooled data from three external repeats  
464 (normalised to the background). Error bars = SEMs (ANOVA). \*:  $p < 0.05$ , two-way ANOVA with  
465 Bonferroni multiple comparison test.

466

467 **Figure 4: Activation of the canonical WNT pathway promotes ZIC5 SUMOylation and TCF-dependent**

468 **transcription. (A and A’)** Relative quantification of the proportion of SUMOylated ZIC5 based on WB  
469 analysis of ZIC5 protein from HEK293T cells co-transfected with V5-ZIC5-WT and EmGFP-SUMO1-WT,  
470 followed by incubation in the presence or absence of LiCl. Basal ZIC5 was quantified from the short  
471 exposure and SUMOylated ZIC5 from the long exposure. (A) Representative WB and corresponding  
472 quantification. (A’) Average relative levels from four external repeats. Error bars = SEM, \*:  $p < 0.01$   
473 paired *t*-test. (B and B’) Luciferase reporter activity in HEK293T cells using the TOPflash reporter  
474 construct in the presence or absence of LiCl over a 9 hr time-course. Note that the untreated

475 normalised Relative Luciferase Value is less than 1, indicative of V5-ZIC5-WT acting as an inhibitor of  
476  $\beta$ -catenin dependent transcription. LiCl treatment causes this value to rise, consistent with a loss of  
477 ZIC5 inhibitory activity (B) Representative experiment with corresponding WB of overexpressed  
478 proteins. Error bars = SD of three internal repeats. (B') Relative luciferase values from three external  
479 repeats. Error bars = SEM of three external repeats. \*:  $p < 0.05$ , two-way ANOVA with Bonferroni  
480 multiple comparison test. In both cases data is normalised to the V5-DEST/ $\beta$ -catenin transfection  
481 corresponding to each sample.

482

483 **Figure 5: WNT responsive SUMOylation of ZIC5 influences both TCF/ $\beta$ -catenin dependent**  
484 **and independent gene expression.** Prior to signalling (left: unstimulated state), WNT target genes  
485 can be constitutively inhibited by nuclear TCF which recruits transcriptional co-repressors such as ZIC  
486 proteins to WNT responsive elements (WRE). This recruitment could limit the availability of ZIC protein  
487 and prevent activation at ZIC responsive elements (ZRE). In this state, cytoplasmic  $\beta$ -catenin is  
488 degraded by the cytoplasmic destruction complex. WNT ligand binding (right: stimulated state)  
489 initiates a cascade of cytoplasmic events (not shown) culminating in  $\beta$ -catenin nuclear entry and also  
490 drives SUMOylation (S) of ZIC to promote the dissociation of the ZIC/TCF repressor complex. This  
491 facilitates both the activation of gene expression via ZREs and the formation of the TCF/ $\beta$ -catenin  
492 complex to activate expression at WREs.

493

## 494 Experimental procedures

### 495 Expression and reporter construct generation

496 The generation of pCMV6-XL5-ZIC5, pENTR3C-ZIC5-WT, V5-ZIC5-WT, TOPflash and FOPflash  
497 (containing a *cfos* promoter and four wild-type or mutant TCF binding sites) has been previously  
498 described (Ahmed *et al.*, 2013). Overlap extension PCR was used to introduce the K393R mutation into  
499 pCMV6-XL5-ZIC5 and a FseI/BstEII fragment of human *ZIC5* digested from the mutated pCMV6-XL5-  
500 *ZIC5* was used to replace the equivalent region in pENTR3C-ZIC5-WT to create pENTR3C-ZIC5-K393R.  
501 The K522R mutation was introduced into pENTR3C-ZIC5-WT by recombineering to create pENTR3C-  
502 *ZIC5*-K522R. Overlap extension PCR was used to introduce the C528S mutation within pENTR3C-ZIC5-  
503 WT to generate pENTR3C-ZIC5-C528S. To generate UBC9-fused proteins for the UFDS assay, the UBC9  
504 cDNA (with stop codon deleted) was amplified from pSG5-HA-hUBC9 (Chang *et al.*, 2007) and inserted  
505 into the KpnI restriction enzyme site at the *ZIC5* N-terminus to create pENTR3C-UBC9-ZIC5-WT,  
506 pENTR3C-UBC9-ZIC5-K393R and pENTR3C-UBC9-ZIC5-K522R. In each case, the insert from the entry  
507 clone was transferred to the destination clone pcDNA3.1/nV5-DEST (Life Technologies) or V1-ORF-  
508 DEST (see below) via a Gateway LR Clonase reaction (as per manufacturer's instructions; Life

509 Technologies) to produce the following plasmids: V5-ZIC5-K393R, V5-ZIC5-K522R, V5-UBC9-ZIC5-WT,  
510 V5-UBC9-ZIC5-K393R, V5-UBC9-ZIC5-K522R, V1-ZIC5-WT and V1-ZIC5-K393R.

511

512 To generate pENTR3C-SUMO1-WT, human *SUMO1* cDNA was PCR amplified from pEYFPC3-SUMO-1  
513 (Harder, Zunino and McBride, 2004) and cloned into BamHI/XhoI restricted pENTR3C. The SUMO-  
514 defective mutant (pENTR3C-SUMO1-ΔGG) was designed based on information in (Kamitani, Nguyen  
515 and Yeh, 1997), and the cDNA synthesised and cloned into pENTR3C by GeneScript. In each case, the  
516 insert from the entry clone was transferred to the destination clone Vivid Colors pcDNA 6.2/N-EmGFP-  
517 DEST (Life Technologies) via a Gateway LR Clonase reaction to produce the following plasmids: EmGFP-  
518 SUMO1-WT and EmGFP-SUMO1-ΔGG.

519

520 To generate pENTR3C-TCF7L2, human *TCF7L2* (previously called *TCF4*) cDNA was PCR amplified from  
521 pFLAG-TCF4 (Pourebahim *et al.*, 2011) and cloned into EcoRI/KpnI restricted pENTR3C. The insert was  
522 transferred to the destination vector V2-ORF-DEST (see below) via a Gateway LR Clonase reaction to  
523 create V2-TCF7L2.

524

525 The V1-ORF-DEST and V2-ORF-DEST expression constructs contain the N-terminal CDS of the Venus  
526 protein (designated V1) or C-terminal CDS of the Venus fluorescent protein (designated V2) upstream  
527 of a site suitable for destination cloning. When used in a Gateway LR Clonase reaction with an entry  
528 construct (such as pENTR3C), a mammalian expression construct is generated that expresses a fusion  
529 protein (either V1- or V2-) and the protein encoded within the entry construct. For example, V2-  
530 Ubiquitin contains the V2 C-terminal fragment fused to the CDS of Ubiquitin.

531

532 The other expression constructs have been previously described: V5-β-CATENIN (pcDNA3.1/V5-HisA-  
533 β-CATENIN) (Usami *et al.*, 2003) and pFLAG-UBC9-C93S (Poukka *et al.*, 1999).

534

535 The *APOE* and *Foxd3* reporters have been described previously as B:*luc2*:*APOE* and B:*luc2*:*Foxd3*,  
536 respectively (Ahmed *et al.*, 2020).

537

### 538 **Cell culture**

539 The Human Embryonic Kidney cell line (HEK293T) was cultured and transiently transfected as  
540 previously described (Ahmed *et al.*, 2013).

541

### 542 **Subcellular fractionation, SDS-PAGE and Western Blotting (WB)**



543 Subcellular fractionations were obtained via a nuclear protein extraction kit (Pierce NE-PER kit)  
544 according to the manufacturer's protocol with the following modifications: 4 x 100 mm tissue culture  
545 (TC) dishes (approximately  $2.8 \times 10^7$  cells, for non-UFDS experiments, Corning®; cat. no. CLS430167),  
546 1 x 60 mm TC dish (approximately  $2.5 \times 10^6$  cells, for UFDS experiments, Corning®; cat. no. CLS430166)  
547 or 6-well TC plates (approximately  $1 \times 10^6$  cells, for luciferase reporter assay WB, Costar®, cat. no.  
548 CLS3516) of 90-100% confluent HEK293T cells were lysed directly using CERI and NER buffer  
549 supplemented with 1x protease inhibitor cocktail (Roche), 1x PhosSTOP (Roche), 2 mM iodoacetamide,  
550 and 1.6 mM N-Ethylmaleimide. 2 mM dithiothreitol (DTT) (Sigma Aldrich) and 1x NuPAGE LDS Sample  
551 Buffer (Life Technologies) were added to nuclear and cytoplasmic fractions and then heated for 5 min  
552 at 90°C. Samples were then loaded onto 7% or 12% SDS-PAGE gels and run at 100 V until proteins  
553 were sufficiently separated. Proteins were transferred to PVDF membranes (Millipore) via wet transfer  
554 at 15 V for 16 hrs. Membranes were blocked overnight at 4°C with 5% skim milk powder/0.2% Tween  
555 20 (Sigma Aldrich)/PBS solution (WB blocking buffer) before being immunoblotted using standard WB  
556 techniques. To detect protein bands, blots were incubated with SuperSignal West Pico reagent (Pierce)  
557 then exposed to film (Amersham Hyperfilm MP, GE Life Sciences). Developed films were scanned and  
558 assembled in Adobe Illustrator CS5.1.

559

## 560 **Antibodies**

561 The following primary antibodies were used: mouse monoclonal anti-V5 (1:200 dilution IF, 1:5000  
562 dilution WB, Life Technologies, cat. no. R960-25), rabbit polyclonal anti-GFP (1:1000 dilution IF, 1:1500  
563 dilution WB, Cell Signaling, cat. no. 2555), rabbit polyclonal anti-lamin B1 (1:1000 dilution IF, 1:1500  
564 dilution WB, Abcam, cat. no. ab16048), mouse monoclonal anti- $\beta$ -tubulin (1:1000 dilution WB, Abcam,  
565 cat. no. ab7792), mouse monoclonal anti-TATA binding protein (TBP; 1:2000 dilution WB, Abcam cat.  
566 no. ab818), goat polyclonal anti- $\beta$ -catenin C-18 (1:500 dilution WB, Santa Cruz, cat. no. sc-1496),  
567 mouse monoclonal anti-UBC9 (1:1000 dilution WB, BD, cat. no. 610748), mouse monoclonal anti-  
568 TCF7L2 (1:1000 dilution WB, Abcam, cat. no. ab32873), mouse monoclonal anti-FLAG (1:1000 dilution  
569 WB, Sigma, cat. no. F1804) and rabbit anti-ZIC5 sera (1:500 dilution WB). The ZIC5 antibody was  
570 generated in rabbits using the epitope described in Inoue *et al*, (2004) as an antigen using standard  
571 techniques. The following secondary antibodies were used for immunofluorescence (1:500 dilution):  
572 Alexa<sup>594</sup> and Alexa<sup>488</sup> conjugated donkey anti-mouse (Molecular Probes, cat. no. A21206) and anti-  
573 rabbit (Molecular Probes, cat. no. A21203). The following secondary antibodies were used for WB  
574 (1:5000 dilution): horse radish peroxidase (HRP)-conjugated rabbit anti-mouse, rabbit anti-goat, and  
575 goat anti-rabbit (Zymed, Life Technologies). All antibodies were diluted in blocking buffer.

576

## 577 **Plasmid Immunoprecipitation (pIP) and quantitative PCR**

578 Plasmid Immunoprecipitation was performed as previously described (Ahmed *et al.*, 2020). HEK293T  
579 cells, grown in 100 mm TC dishes (Sigma; CLS430167) were transfected with 8 µg of *APOE* or *Foxd3*  
580 reporter construct and 16 µg of V5-ZIC5-WT or V5-ZIC5-C528S.

581

582 Quantitative PCR was performed as described in Ahmed *et al.*, (2020). The primers used for the *APOE*  
583 promoter were Ark1669 (5'- GACTGTGGGGGGTGGTC -3') and Ark1670 (5'-  
584 AGACTTGTCCAATTATAGGGCTC -3'). Primers used to amplify the *Foxd3* region were Ark1671 (5'-  
585 GTACATTCAAGCTCCGTTGCC -3') and Ark1672 (5'- CCAGAACCAGGCTCTAAATTGG -3').

586

## 587 **Luciferase reporter assays**

588 HEK293T cells, grown in 6-well TC plates (Costar; CLS3516), were transfected with the combination of  
589 constructs appropriate for each experiment. For ZIC transactivation assays a total of 4.5 µg of DNA  
590 was added per well: 1 µg of the *APOE* or *Foxd3* reporter construct, 3 µg of either the ZIC5 expression  
591 construct or the empty construct (pcDNA3.1/nV5-DEST™) and 0.5 µg of either empty pcDNA3.1/nV5-  
592 DEST vector or FLAG-DN-UBC9. For β-catenin-mediated transcription assays, a total of 4.5 µg of DNA  
593 was transfected per well: 1 µg of the TOPflash or FOPflash reporter vectors, either 1 µg V5-β-CATENIN  
594 expression construct, 2 µg of the appropriate ZIC5 expression construct or the empty pcDNA3.1/nV5-  
595 DEST vector, and 0.5 µg of either empty pcDNA3.1/nV5-DEST vector or FLAG-DN-UBC9. To assess WNT  
596 background levels, the 1 µg V5-β-CATENIN expression construct was substituted with 1 µg  
597 pcDNA3.1/nV5-DEST. 5.5-8 hr post-transfection, cells were dissociated from the growth surface using  
598 0.05 g/L trypsin and plated in triplicate onto a solid white, TC treated, 96-well plate (Costar; CLS3917).  
599 To avoid positional bias of the luminometer, sample order was randomised for each independent  
600 experimental repeat. The remaining cells were re-plated for WB analysis. 24 hr post-transfection, the  
601 cells for the luciferase assay were exposed to 100 µL of a 1:1 dilution of DMEM and luciferase substrate  
602 (ONE-Glo Luciferase Assay System, Promega), and luminescence from each well measured in a  
603 GloMax-96 Microplate Luminometer (Promega). The cells reserved for WB were lysed.

604

## 605 **BiFC assays**

606 HEK293T cells, grown in 6-well TC plates (Costar; CLS3513) were transfected with 2 µg of V2-TCF7L2  
607 or V2-Ubiquitin and 2 µg of either V1-ORF-DEST, V1-ZIC5-WT or V1-ZIC5-K393R. For the competition  
608 assays, cells were transfected with 1 µg V2-TCF7L2, 1 µg of V1-ORF-DEST or V1-ZIC5-WT, and either 0  
609 µg, 1 µg or 2 µg of V5-ZIC5-WT as well as pcDNA3.1/nV5-DEST to keep the total amount of DNA  
610 consistent. 24 hr post-transfection, cells were dissociated from the growth surface using 0.05 g/L

611 trypsin and plated in triplicate onto a solid white, TC treated, 96-well plate (Costar; CLS3917). To avoid  
612 positional bias of the luminometer, sample order was randomised for each independent experimental  
613 repeat and the remaining cells re-plated for WB analysis. 48 hr post-transfection, media was removed  
614 from the cells for BiFC analysis, replaced with 1x PBS, and fluorescence measured using the M1000  
615 Pro multimode fluorescence plate reader (Tecan). The cells reserved for WB were lysed.

616

#### 617 **LiCl treatment**

618 For WB analysis of the SUMOylated form of ZIC5, 4 x 100 mm tissue TC dishes (Corning; CLS430167),  
619 each containing approximately  $5.6 \times 10^7$  cells, were transfected with 12  $\mu$ g of V5-ZIC5-WT and 12  $\mu$ g  
620 of EmGFP-SUMO1-WT per plate. 6 hr later, cells were dissociated from the growth surface using 0.05  
621 g/L trypsin, and replated into 8 x 100 mm TC dishes. 24 hr post-transfection, LiCl (final concentration  
622 20 mM) was added to half of the dishes. 48 hr post-transfection, cells were lysed for WB. Post-WB,  
623 relative amounts of SUMOylated and non-SUMOylated protein were quantified from scanned images  
624 using ImageJ (NIH).

625

626 For TOPflash assays, HEK293T cells, grown in 100 mm tissue TC dishes (Corning; CLS430167), were  
627 transfected with TOPflash (6  $\mu$ g), V5- $\beta$ -CATENIN (6  $\mu$ g) and either V5-DEST or V5-ZIC5-WT (12  $\mu$ g). 6  
628 hr post-transfection, cells were replated into 12-well dishes (Corning; CLS3513). 20-22 hr post-  
629 transfections, half of the dishes were treated with LiCl (final concentration 20 mM) before harvesting  
630 at 0, 1.5, 3, 6 and 9 h. At each time point  $\sim 6.0 \times 10^4$  cells (from each treatment) were used to assay  
631 reporter activity and the remainder lysed for WB analysis.

632

#### 633 **Immunofluorescence staining, microscopy and quantitation of subcellular localisation**

634 Cells were prepared for immunofluorescence microscopy and the cytoplasmic and nuclear localisation  
635 was analysed as described previously (Ahmed *et al.*, 2013). For co-localisation experiments, cells were  
636 viewed using a Leica TCA SP5 confocal laser scanning microscope using a 63x oil immersion objective.  
637 The ImageJ (NIH) Line Tool was used to determine whether ZIC5 was enriched in SUMO1 foci. At least  
638 120 SUMO1 foci were analysed for each experiment and three independent experiments were  
639 performed. Images for publication were assembled in Photoshop CS7.

640

#### 641 **Isolation of the *Zic5R* (kiska; *Ki*) strain**

642 The following primers were used to screen an archive of genomic DNA constructed from the F1  
643 progeny of BALB/c N-ethyl-N-nitrosourea (ENU) mutagenised males and C3H/HeH females (Coghill *et*  
644 *al.*, 2002; Quwailid *et al.*, 2004): Ark280 (exon 1; Forward, 5' CTT TCC TGC GCT ACA TGC 3') and Ark281

645 (intron 1/2; Reverse, 5' CAG GGA AAA ATG AAA GCG AAC 3'). The 435 bp fragment, spanning the ZF-  
646 NC domain and zinc fingers 1-3, was amplified from 5760 animals (arranged as 1440 pools, with each  
647 pool containing genomic DNA from four individual animals). DNA pooling, PCR and heteroduplex  
648 formation was as previously described (Quwailid *et al.*, 2004). Each amplicon was analysed by  
649 denaturing high performance liquid chromatography (DHPLC) on a Transgenomic Wave machine  
650 according to the manufacturer's instructions (Transgenomic). For amplicons exhibiting a DHPLC trace  
651 divergent to that obtained from wild-type F1 DNA, the corresponding four DNAs were individually  
652 amplified, purified and subjected to Sanger Sequencing using standard procedures to discern the  
653 nature of the mutation and the identity of the carrier animal. Subsequently, the *Zic5<sup>Ki</sup>* strain was  
654 recovered by IVF of C3H/HeH eggs, using standard procedures, with the corresponding frozen sperm  
655 sample.

656

### 657 **Mouse strains and husbandry**

658 Mice were maintained according to Australian Standards for Animal Care under protocol A2018/36  
659 approved by The Australian National University Animal Ethics and Experimentation Committee for this  
660 study. The *Zic5<sup>tm1Sia</sup>* targeted null allele (MGI:3574814) of *Zic5* (*Zic5*) (Furushima *et al.*, 2005) and the  
661 *Zic5<sup>Ki</sup>* ENU allele were backcrossed for 10 generations to the C3H/HeH inbred strain and subsequently  
662 for >10 generations to the C57Bl6/J inbred strain. Mice were maintained in a light cycle of 12 hr light:  
663 12 hr dark, the midpoint of the dark cycle being 12 AM. Mice were genotyped by PCR screening of  
664 genomic DNA extracted from ear biopsy tissue (Arkell *et al.*, 2001). For the *Zic5<sup>tm1Sia</sup>* strain, genomic  
665 DNA (50 ng) was amplified for High Resolution Melt Analysis (HRMA) using IMMOLASE DNA  
666 Polymerase using the primers and PCR conditions described for the Z5N assay (Supplementary  
667 information; Thomsen *et al.*, 2012). For the *Zic5<sup>Ki</sup>* strain, genomic DNA (50 ng) was amplified for Allelic  
668 Discrimination using the following primers and probes: Ark1271, forward (5' GGC CTT CCT GCG CTA  
669 CAT G 3'), Ark1272, reverse (5' GGT CCA GCC ACT TGC AGA TG 3'), Probe 1 (wild-type; 5' VIC – TCC  
670 CGC TTG ATT GG 3'), Probe 2 (mutation; 5' FAM – CTC CCG CCT GAT T 3') and Platinum Quantitative  
671 PCR SuperMix-UDG w/ROX (Life Technologies). The products were amplified and analysed on an ABI  
672 StepOne PCR machine.

673

### 674 **Whole mount in situ hybridisation**

675 Whole mount in situ hybridisation (WMISH) to *Foxd3* was performed as previously described (Elms *et*  
676 *al.*, 2003; Barratt and Arkell, 2020b, 2020a). A minimum of four embryos for each genotype were  
677 compared at eight somites to precisely stage-matched wild-type littermates.

678

## 679 **Statistical analysis**

680 For cell-based assays where one representative experiment is shown, the standard deviation was  
681 calculated from three internal repeats using Excel. For analysis of the pooled raw data (from a  
682 minimum of three external repeats) of these assays, GenStat software (VSN International) was used  
683 to test for normality (W-test) and to perform a two-way ANOVA and Bonferroni multiple comparison  
684 test. Post statistical analysis, the values calculated by the ANOVA and the SEM were normalised to the  
685 negative control and relative values plotted.

686

687 For statistical analysis of the amount of ZIC5 SUMOylated in response to LiCl treatment, GenStat  
688 software was used to perform a paired two-sample *t*-test on data from five independent repeats. For  
689 analysis of subcellular localisation and co-localisation, GenStat software was used to perform a  
690 regression analysis. Post analysis, predicted means and standard error of difference (SED; subcellular  
691 localisation) or standard error (SE; for co-localisation studies) was plotted. Mouse breeding data was  
692 tested for altered phenotype frequency between genotypes using a G-test of goodness-of-fit.

693

## 694 **Acknowledgements**

695 We thank the following for the gift of plasmids: S. Tejpar; pFLAG-TCF4, S.M. Huang; pSG5-HA-hUBC9,  
696 H. McBride; pEYFPC3-SUMO-1, F. Zafra; pXP2-*ApoE*, Y. Sekido; pcDNA3.1/V5-HisA- $\beta$ -CATENIN, O.  
697 Janne; pFLAG-Ubc9-C93S, R. Niedenthal; UFDS plasmids and D. Saunders; V2-ubiquitin, V1-ORF, V2-  
698 ORF. We thank S. Aizawa for the *Zic5* null mouse strain. We thank P.I Denny, D. Quwalid and M. Fray  
699 for technical assistance with the isolation of the *Zic5* K393R allele. We thank R. Houtemeyer for  
700 technical assistance with luciferase reporter assays and helpful discussions. This work was supported  
701 by the award of a Sylvia and Charles Viertel Senior Medical Fellowship to RMA.

702

## 703 **Author Contribution statement**

704 Conceptualization: R.G.A., R.M.A.; Methodology: R.G.A., R.M.A.; Validation: R.G.A., R.M.A.; Formal  
705 analysis: R.M.A., H.B, J.A; Investigation: R.G.A., H.B., N.W., J.A, K.B and K.N. Resources: R.M.A.;  
706 Writing - original draft: R.G.A.; Writing - review & editing: H.B., K.E.M, K.S.B, R.M.A.; Visualization:  
707 R.G.A., H.B., J.A, K.B and K.N. ; Supervision: R.M.A; Project administration: R.M.A.; Funding  
708 acquisition: R.M.A.

709

## 710 **References**

711 Ahmed, J. N. *et al.* (2013) 'A murine *Zic3* transcript with a premature termination codon evades

712 nonsense-mediated decay during axis formation', *Dis Model Mech*, 6(3), pp. 755–767. doi:  
713 10.1242/dmm.011668\rdmm.011668 [pii].

714 Ahmed, J. N. *et al.* (2020) 'Systematized reporter assays reveal ZIC protein regulatory abilities are  
715 Subclass- specific and dependent upon transcription factor binding site context', *Scientific Reports*,  
716 61(0), pp. 1–23.

717 Ali, R. G., Bellchambers, H. M. and Arkell, R. M. (2012) 'Zinc fingers of the cerebellum (Zic):  
718 Transcription factors and co-factors', *International Journal of Biochemistry and Cell Biology*. Elsevier  
719 Ltd, 44(11), pp. 2065–2068. doi: 10.1016/j.biocel.2012.08.012.

720 Arkell, R. M. *et al.* (2001) 'Genetic, physical, and phenotypic characterization of the Del(13)Svea36H  
721 mouse', *Mammalian Genome*. doi: 10.1007/s00335-001-2066-2.

722 Aruga, J. *et al.* (2006) 'A wide-range phylogenetic analysis of Zic proteins: Implications for  
723 correlations between protein structure conservation and body plan complexity', *Genomics*, 87(6),  
724 pp. 783–792. doi: 10.1016/j.ygeno.2006.02.011.

725 Barratt, K. S. and Arkell, R. M. (2020a) 'Production of Digoxigenin-Labeled Riboprobes for In Situ  
726 Hybridization Experiments', *Current Protocols in Mouse Biology*. John Wiley & Sons, Ltd, 10(2). doi:  
727 10.1002/cpmo.74.

728 Barratt, K. S. and Arkell, R. M. (2020b) 'Whole-Mount In Situ Hybridization in Post-Implantation  
729 Staged Mouse Embryos', *Current Protocols in Mouse Biology*. John Wiley & Sons, Ltd, 10(2). doi:  
730 10.1002/cpmo.75.

731 Barriga, E. H. *et al.* (2015) 'Animal models for studying neural crest development: Is the mouse  
732 different?', *Development (Cambridge)*, 142(9), pp. 1555–1560. doi: 10.1242/dev.121590.

733 Bronner, M. E. and Simões-Costa, M. (2016) 'The Neural Crest Migrating into the Twenty-First  
734 Century', in *Current Topics in Developmental Biology*. doi: 10.1016/bs.ctdb.2015.12.003.

735 Brown, L. Y. *et al.* (2005) 'In vitro analysis of partial loss-of-function ZIC2 mutations in  
736 holoprosencephaly: Alanine tract expansion modulates DNA binding and transactivation', *Human*  
737 *Molecular Genetics*, 14(3), pp. 411–420. doi: 10.1093/hmg/ddi037.

738 Chang, Y. L. *et al.* (2007) 'Regulation of nuclear receptor and coactivator functions by the carboxyl  
739 terminus of ubiquitin-conjugating enzyme 9', *International Journal of Biochemistry and Cell Biology*.  
740 doi: 10.1016/j.biocel.2007.02.002.

741 Chen, L. *et al.* (2013) 'Sumoylation regulates nuclear localization and function of zinc finger  
742 transcription factor ZIC3', *Biochimica et Biophysica Acta - Molecular Cell Research*. doi:  
743 10.1016/j.bbamcr.2013.07.009.

744 Choi, H. K. *et al.* (2011) 'Reversible SUMOylation of TBL1-TBLR1 Regulates  $\beta$ -Catenin-Mediated Wnt  
745 Signaling', *Molecular Cell*. Elsevier Inc., 43(2), pp. 203–216. doi: 10.1016/j.molcel.2011.05.027.

- 746 Coghill, E. L. *et al.* (2002) 'A gene-driven approach to the identification of ENU mutants in the  
747 mouse', *Nature Genetics*. doi: 10.1038/ng847.
- 748 de Cristofaro, T. *et al.* (2009) 'Pax8 protein stability is controlled by sumoylation', *Journal of*  
749 *Molecular Endocrinology*. doi: 10.1677/JME-08-0100.
- 750 Elms, P. *et al.* (2003) 'Zic2 is required for neural crest formation and hindbrain patterning during  
751 mouse development', *Developmental Biology*, 264(2), pp. 391–406. doi:  
752 10.1016/j.ydbio.2003.09.005.
- 753 Elms, P. *et al.* (2004) 'Overlapping and distinct expression domains of Zic2 and Zic3 during mouse  
754 gastrulation', *Gene Expression Patterns*, 4(5), pp. 505–511. doi: 10.1016/j.modgep.2004.03.003.
- 755 Ferrer-Vaquer, A. *et al.* (2010) 'A sensitive and bright single-cell resolution live imaging reporter of  
756 Wnt/ss-catenin signaling in the mouse', *BMC developmental biology*. 2010/12/24, 10, p. 121. doi:  
757 10.1186/1471-213X-10-121.
- 758 Flotho, A. and Melchior, F. (2013) 'Sumoylation: A Regulatory Protein Modification in Health and  
759 Disease', *Annual Review of Biochemistry*. doi: 10.1146/annurev-biochem-061909-093311.
- 760 Fujimi, T. J., Hatayama, M. and Aruga, J. (2012) 'Xenopus Zic3 controls notochord and organizer  
761 development through suppression of the Wnt/Beta-catenin signaling pathway', *Developmental*  
762 *Biology*. Elsevier B.V., 361(2), pp. 220–231. doi: 10.1016/j.ydbio.2011.10.026.
- 763 Furushima, K. *et al.* (2000) 'A new murine zinc finger gene, Opr', *Mechanisms of Development*, 98(1–  
764 2), pp. 161–164. doi: 10.1016/S0925-4773(00)00456-1.
- 765 Furushima, K. *et al.* (2005) 'Characterization of Opr deficiency in mouse brain: subtle defects in  
766 dorsomedial telencephalon and medioventral forebrain.', *Developmental Dynamics*, 232(4), pp.  
767 1056–61. doi: 10.1002/dvdy.20253.
- 768 Gammons, M. and Bienz, M. (2018) 'Multiprotein complexes governing Wnt signal transduction',  
769 *Current Opinion in Cell Biology*. doi: 10.1016/j.ceb.2017.10.008.
- 770 Gao, C., Xiao, G. and Hu, J. (2014) 'Regulation of Wnt/ $\beta$ -catenin signaling by posttranslational  
771 modifications', *Cell and Bioscience*, 4(1), pp. 1–20. doi: 10.1186/2045-3701-4-13.
- 772 Gareau, J. R. and Lima, C. D. (2010) 'The SUMO pathway: Emerging mechanisms that shape  
773 specificity, conjugation and recognition', *Nature Reviews Molecular Cell Biology*. doi:  
774 10.1038/nrm3011.
- 775 Geiss-Friedlander, R. and Melchior, F. (2007) 'Concepts in sumoylation: A decade on', *Nature*  
776 *Reviews Molecular Cell Biology*. doi: 10.1038/nrm2293.
- 777 Gocke, C. B., Yu, H. and Kang, J. (2005) 'Systematic identification and analysis of mammalian small  
778 ubiquitin-like modifier substrates', *Journal of Biological Chemistry*. doi: 10.1074/jbc.M411718200.
- 779 Han, Z. J. *et al.* (2018) 'The post-Translational modification, SUMOylation, and cancer (Review)',

- 780 *International Journal of Oncology*, 52(4), pp. 1081–1094. doi: 10.3892/ijo.2018.4280.
- 781 Harder, Z., Zunino, R. and McBride, H. (2004) 'Sumo1 Conjugates Mitochondrial Substrates and  
782 Participates in Mitochondrial Fission', *Current Biology*. doi: 10.1016/j.cub.2004.02.004.
- 783 Hendriks, I. A. and Vertegaal, A. C. O. (2016) 'A comprehensive compilation of SUMO proteomics',  
784 *Nature Reviews Molecular Cell Biology*. Nature Publishing Group, 17(9), pp. 581–595. doi:  
785 10.1038/nrm.2016.81.
- 786 Henley, J. M., Craig, T. J. and Wilkinson, K. a. (2014) 'Neuronal SUMOylation: Mechanisms,  
787 Physiology, and Roles in Neuronal Dysfunction', *Physiological Reviews*, 94(4), pp. 1249–1285. doi:  
788 10.1152/physrev.00008.2014.
- 789 Houtmeyers, R. *et al.* (2013) 'The ZIC gene family encodes multi-functional proteins essential for  
790 patterning and morphogenesis', *Cellular and Molecular Life Sciences*, 70(20), pp. 3791–3811. doi:  
791 10.1007/s00018-013-1285-5.
- 792 Inoue, T. *et al.* (2004) 'Mouse Zic5 deficiency results in neural tube defects and hypoplasia of  
793 cephalic neural crest derivatives', *Developmental Biology*, 270(1), pp. 146–162. doi:  
794 10.1016/j.ydbio.2004.02.017.
- 795 Ishiguro, A. *et al.* (2004) 'Molecular properties of Zic4 and Zic5 proteins: Functional diversity within  
796 Zic family', *Biochemical and Biophysical Research Communications*. doi: 10.1016/j.bbrc.2004.09.052.
- 797 Jakobs, A. *et al.* (2007) 'Ubc9 fusion-directed SUMOylation (UFDS): A method to analyze function of  
798 protein SUMOylation', *Nature Methods*. doi: 10.1038/nmeth1006.
- 799 Kamitani, T., Nguyen, H. P. and Yeh, E. T. H. (1997) 'Preferential modification of nuclear proteins by a  
800 novel ubiquitin-like molecule', *Journal of Biological Chemistry*. doi: 10.1074/jbc.272.22.14001.
- 801 Kim, M. J., Chia, I. V and Costantini, F. (2008) 'SUMOylation target sites at the C terminus protect  
802 Axin from ubiquitination and confer protein stability.', *FASEB journal : official publication of the  
803 Federation of American Societies for Experimental Biology*, 22(11), pp. 3785–94. doi: 10.1096/fj.08-  
804 113910.
- 805 Kodama, Y. and Hu, C. D. (2012) 'Bimolecular fluorescence complementation (BiFC): A 5-year update  
806 and future perspectives', *BioTechniques*. doi: 10.2144/000113943.
- 807 Korinek, V. *et al.* (1997) 'Constitutive transcriptional activation by a  $\beta$ -catenin-Tcf complex in APC(-/-)  
808 colon carcinoma', *Science*. doi: 10.1126/science.275.5307.1784.
- 809 Koyabu, Y. *et al.* (2001) 'Physical and functional interactions between Zic and Gli proteins.' *American  
810 Society for Biochemistry and Molecular Biology*, 276(10). doi: 10.1074/jbc.C000773200.
- 811 Lallemand-Breitenbach, V. and de Thé, H. (2018) 'PML nuclear bodies: from architecture to function',  
812 *Current Opinion in Cell Biology*. doi: 10.1016/j.ceb.2018.03.011.
- 813 Liu, J. A. J. *et al.* (2013) 'Phosphorylation of Sox9 is required for neural crest delamination and is



- 814 regulated downstream of BMP and canonical Wnt signaling', *Proceedings of the National Academy of*  
815 *Sciences of the United States of America*. doi: 10.1073/pnas.1211747110.
- 816 Luan, Z. *et al.* (2013) 'SUMOylation of Pax7 is essential for neural crest and muscle development',  
817 *Cellular and Molecular Life Sciences*. doi: 10.1007/s00018-012-1220-1.
- 818 Mašek, J. *et al.* (2016) 'Tcf7l1 protects the anterior neural fold from adopting the neural crest fate',  
819 *Development (Cambridge)*, 143(12), pp. 2206–2216. doi: 10.1242/dev.132357.
- 820 Matunis, M. J. and Rodriguez, M. S. (2016) 'Concepts and methodologies to study protein  
821 SUMOylation: An overview', in *Methods in Molecular Biology*. doi: 10.1007/978-1-4939-6358-4\_1.
- 822 Murgan, S. *et al.* (2015) 'Atypical Transcriptional Activation by TCF via a Zic Transcription Factor in *C.*  
823 *elegans* Neuronal Precursors', *Developmental Cell*. doi: 10.1016/j.devcel.2015.04.018.
- 824 Navascués, J. *et al.* (2007) 'Characterization of a new SUMO-1 nuclear body (SNB) enriched in pCREB,  
825 CBP, c-Jun in neuron-like UR61 cells', *Chromosoma*. doi: 10.1007/s00412-007-0107-7.
- 826 Poukka, H. *et al.* (1999) 'Ubc9 interacts with the androgen receptor and activates receptor-  
827 dependent transcription', *Journal of Biological Chemistry*. doi: 10.1074/jbc.274.27.19441.
- 828 Pourebrahim, R. *et al.* (2011) 'Transcription factor Zic2 inhibits Wnt/Beta-catenin protein signaling',  
829 *Journal of Biological Chemistry*, 286(43), pp. 37732–37740. doi: 10.1074/jbc.M111.242826.
- 830 Quwailid, M. M. *et al.* (2004) 'A gene-driven ENU-based approach to generating an allelic series in  
831 any gene', *Mammalian Genome*. doi: 10.1007/s00335-004-2379-z.
- 832 Ramakrishnan, A. B. *et al.* (2018) 'The Wnt Transcriptional Switch: TLE Removal or Inactivation?',  
833 *BioEssays*. doi: 10.1002/bies.201700162.
- 834 Rogers, C. D. and Nie, S. (2018) 'Specifying neural crest cells: From chromatin to morphogens and  
835 factors in between', *Wiley Interdisciplinary Reviews: Developmental Biology*. doi: 10.1002/wdev.322.
- 836 Salero, E. *et al.* (2001) 'Transcription factors Zic1 and Zic2 bind and transactivate the apolipoprotein  
837 E gene promoter', *Journal of Biological Chemistry*, 276(3), pp. 1881–1888. doi:  
838 10.1074/jbc.M007008200.
- 839 Simões-Costa, M. and Bronner, M. E. (2015) 'Establishing neural crest identity: a gene regulatory  
840 recipe', *Development (Cambridge, England)*. doi: 10.1242/dev.105445.
- 841 Simões-Costa, M. S. *et al.* (2012) 'Dynamic and Differential Regulation of Stem Cell Factor FoxD3 in  
842 the Neural Crest Is Encrypted in the Genome', *PLoS Genetics*. doi: 10.1371/journal.pgen.1003142.
- 843 Stuhlmeier, T. J. and García-Castro, M. I. (2012) 'Current perspectives of the signaling pathways  
844 directing neural crest induction', *Cellular and Molecular Life Sciences*. doi: 10.1007/s00018-012-  
845 0991-8.
- 846 Taylor, K. M. and LaBonne, C. (2005) 'SoxE factors function equivalently during neural crest and inner  
847 ear development and their activity is regulated by SUMOylation', *Developmental Cell*. doi:

848 10.1016/j.devcel.2005.09.016.  
849 Thomsen, N. *et al.* (2012) 'High Resolution Melt Analysis (HRMA); a Viable Alternative to Agarose Gel  
850 Electrophoresis for Mouse Genotyping', *PLoS ONE*, 7(9), p. e45252. doi:  
851 10.1371/journal.pone.0045252.  
852 Tohmonda, T. *et al.* (2018) 'Identification and characterization of novel conserved domains in  
853 metazoan Zic proteins', *Molecular Biology and Evolution*, 35(9), pp. 2205–2229. doi:  
854 10.1093/molbev/msy122.  
855 Usami, N. *et al.* (2003) 'β-catenin inhibits cell growth of a malignant mesothelioma cell line, NCI-H28,  
856 with a 3p21.3 homozygous deletion', *Oncogene*. Nature Publishing Group, 22(39), pp. 7922–7930.  
857 doi: 10.1038/sj.onc.1206533.  
858 Varejão, N. *et al.* (2020) 'Molecular mechanisms in SUMO conjugation', *Biochemical Society*  
859 *Transactions*, 48(1), pp. 123–135. doi: 10.1042/BST20190357.  
860 Ware, S. M. *et al.* (2004) 'Identification and functional analysis of ZIC3 mutations in heterotaxy and  
861 related congenital heart defects.', *American Journal of Human Genetics*, 74(1), pp. 93–105. doi:  
862 10.1086/380998.  
863 Wei, F., Schöler, H. R. and Atchison, M. L. (2007) 'Sumoylation of Oct4 enhances its stability, DNA  
864 binding, and transactivation', *Journal of Biological Chemistry*. doi: 10.1074/jbc.M611041200.  
865 Yamamoto, H. *et al.* (2003) 'Sumoylation is involved in B-catenin-dependent activation of Tcf-4',  
866 *EMBO Journal*, 22(9), pp. 2047–2059. doi: 10.1093/emboj/cdg204.  
867 York, J. R. and McCauley, D. W. (2020) 'The origin and evolution of vertebrate neural crest cells',  
868 *Open Biology*. Royal Society Publishing, 10(1). doi: 10.1098/rsob.190285.  
869 Zhao, Z. *et al.* (2019) 'β-Catenin/Tcf7l2-dependent transcriptional regulation of GLUT1 gene  
870 expression by Zic family proteins in colon cancer', *Science Advances*, 5(7), pp. 1–14. doi:  
871 10.1126/sciadv.aax0698.  
872  
873

Figure 1

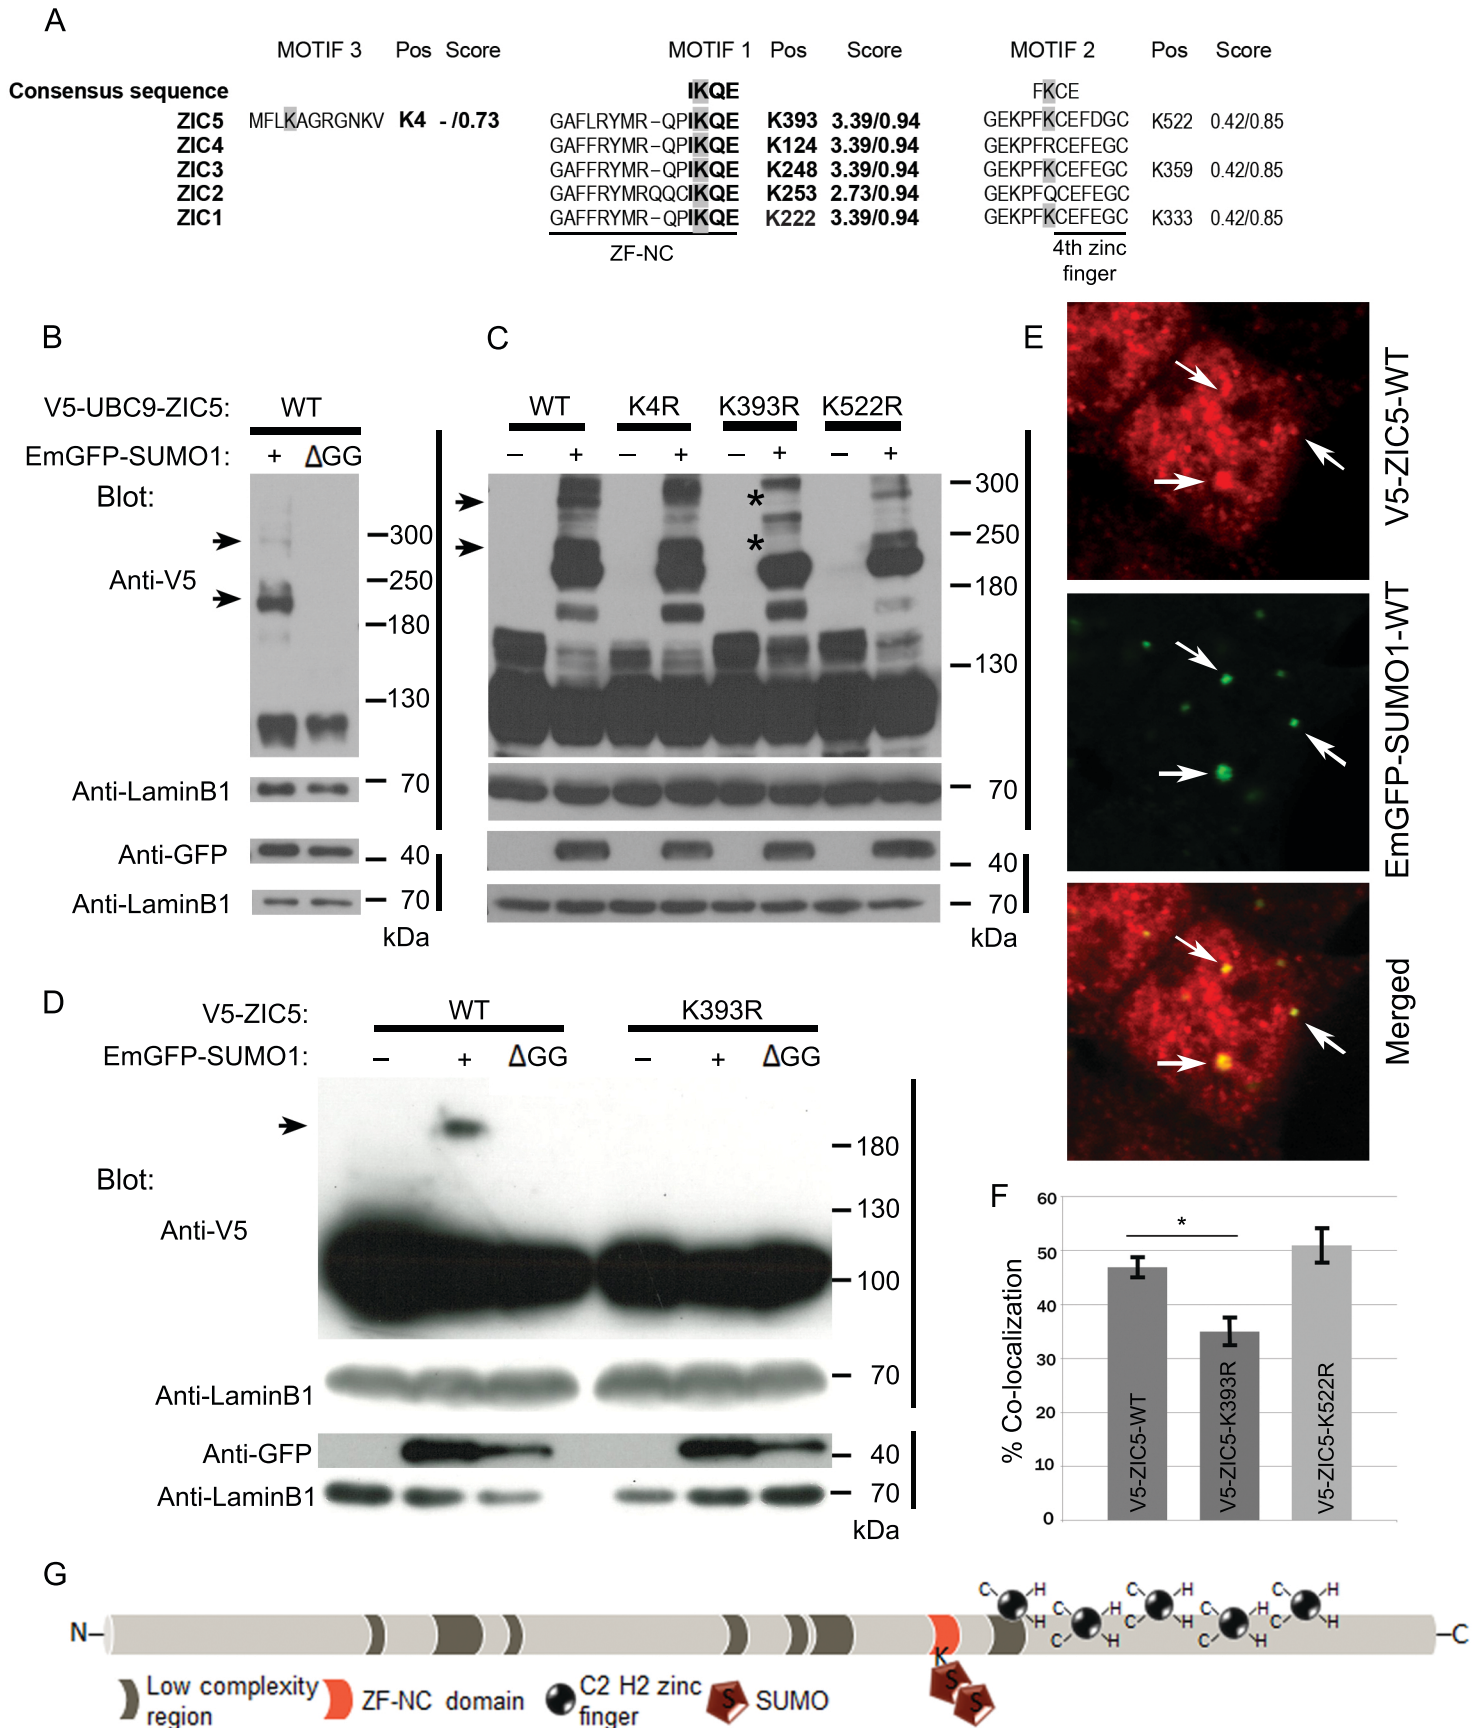

Figure 2

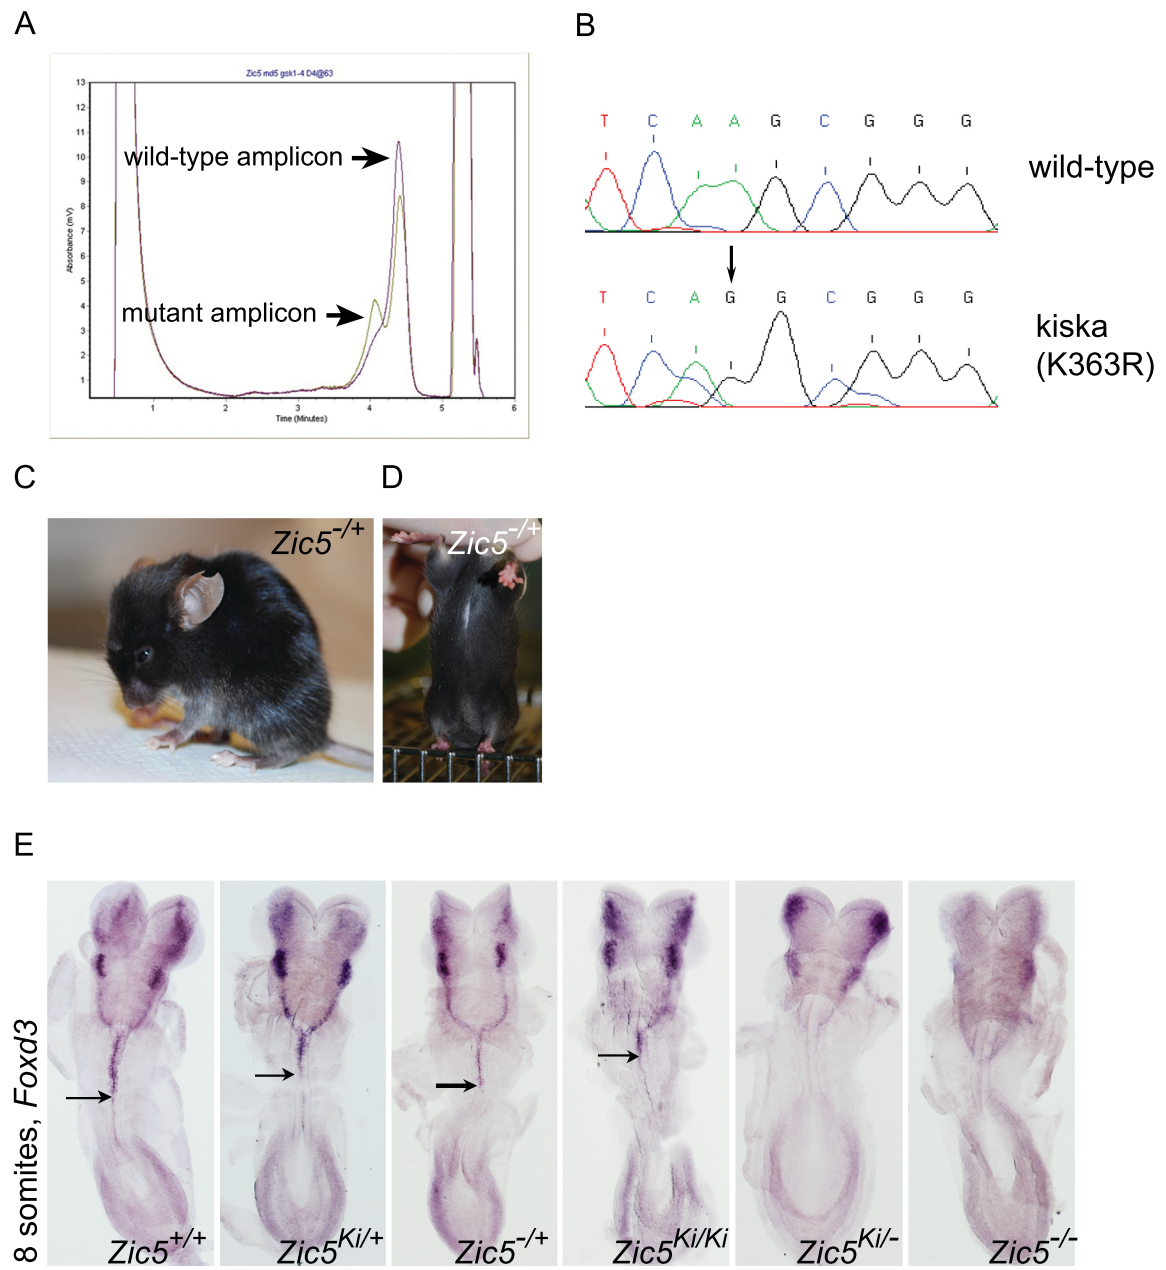

Figure 3

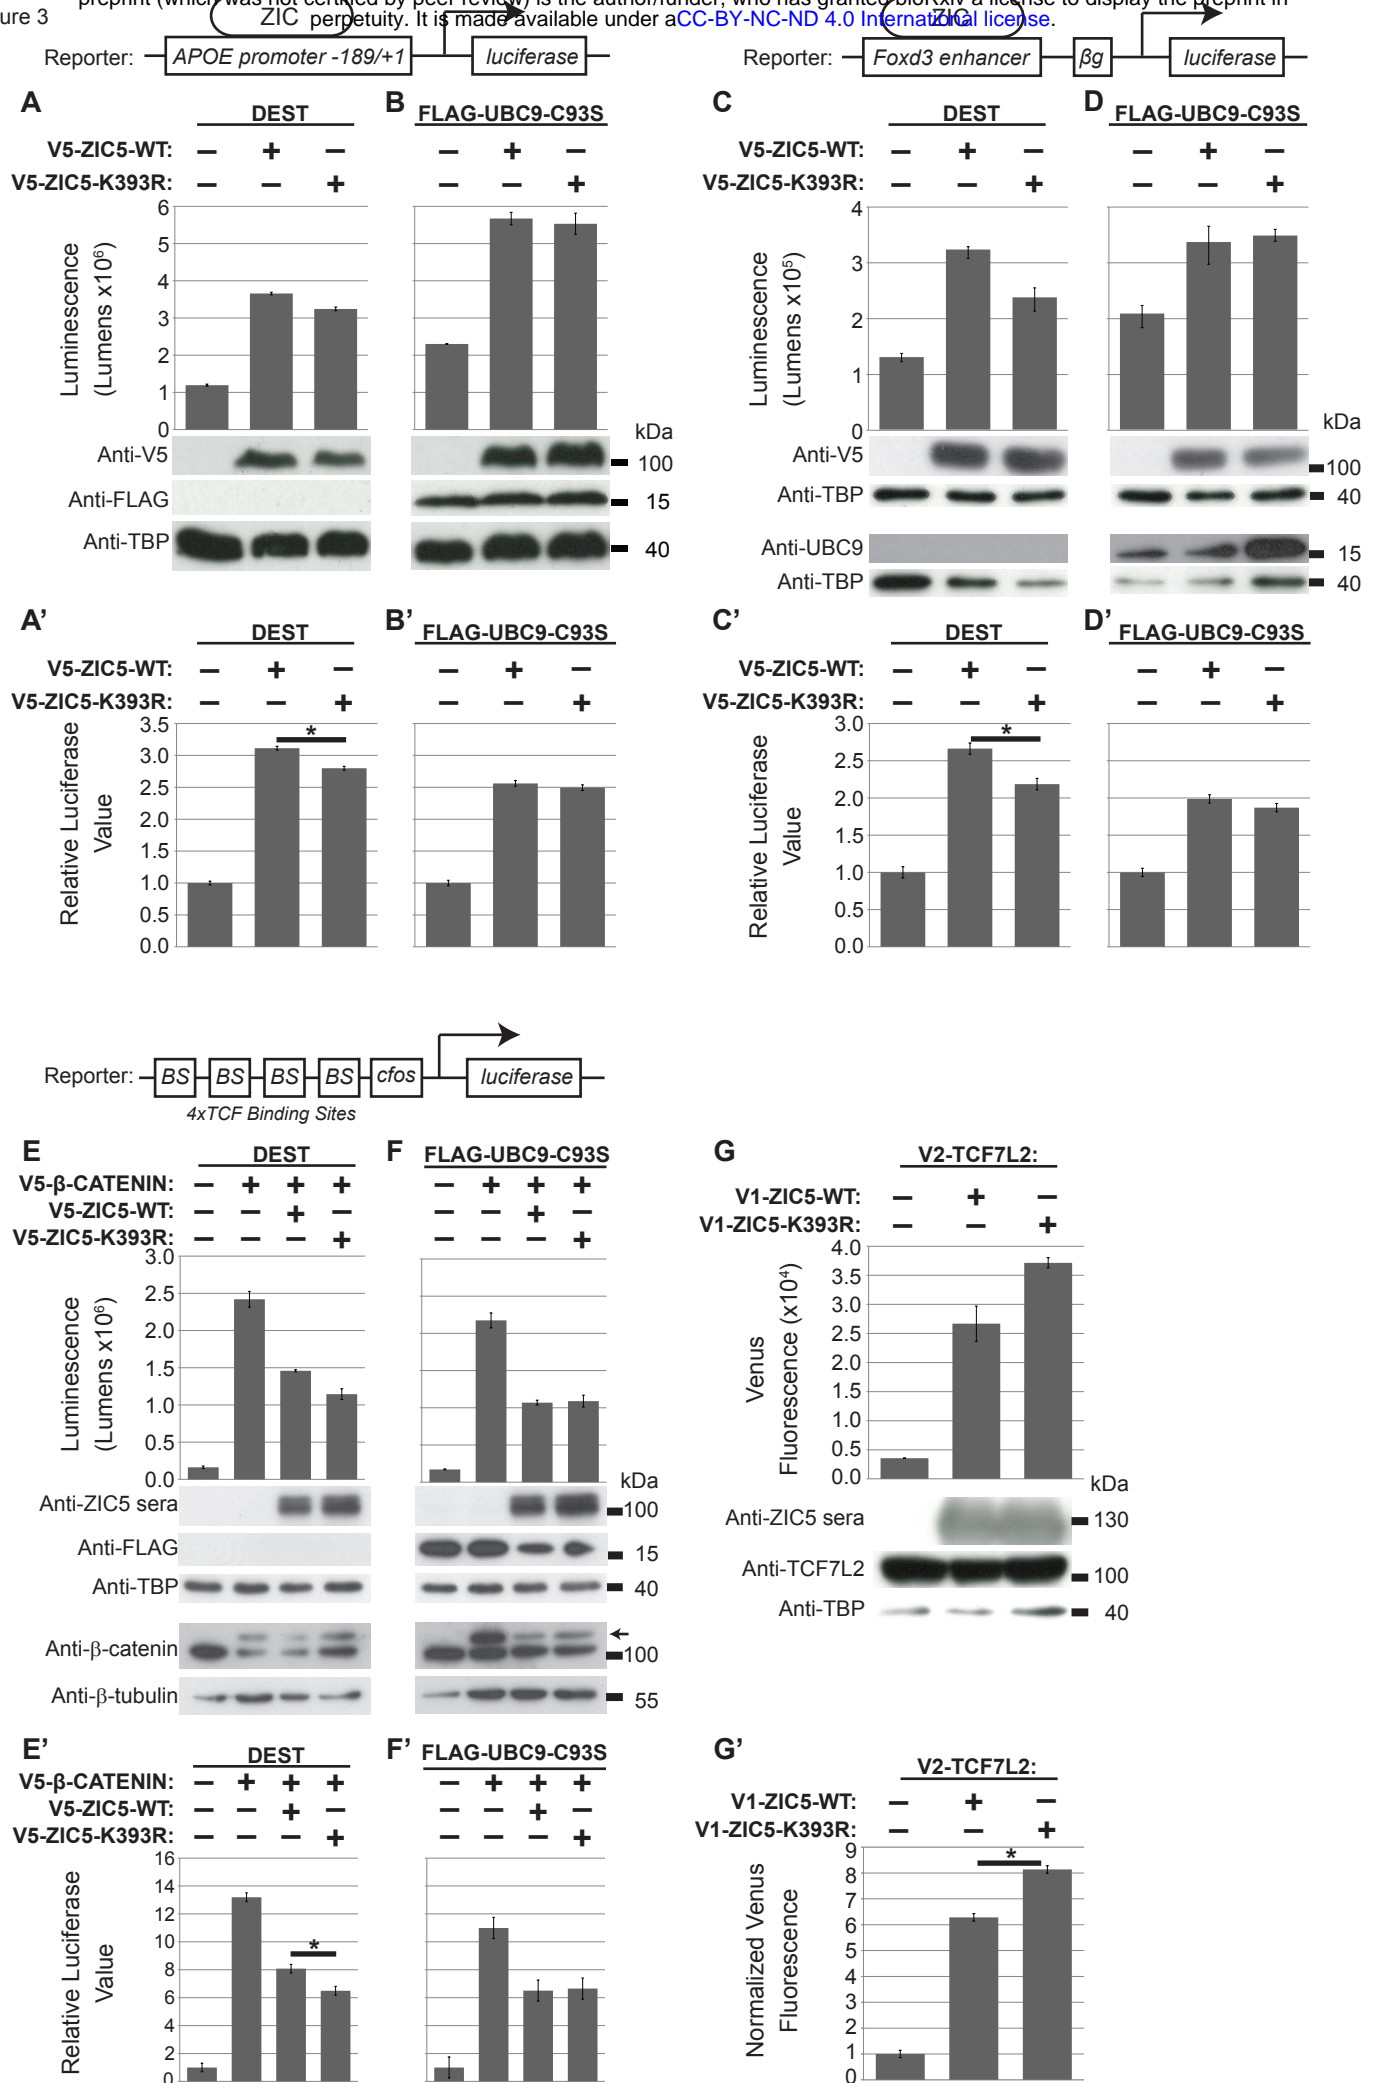

Figure 4

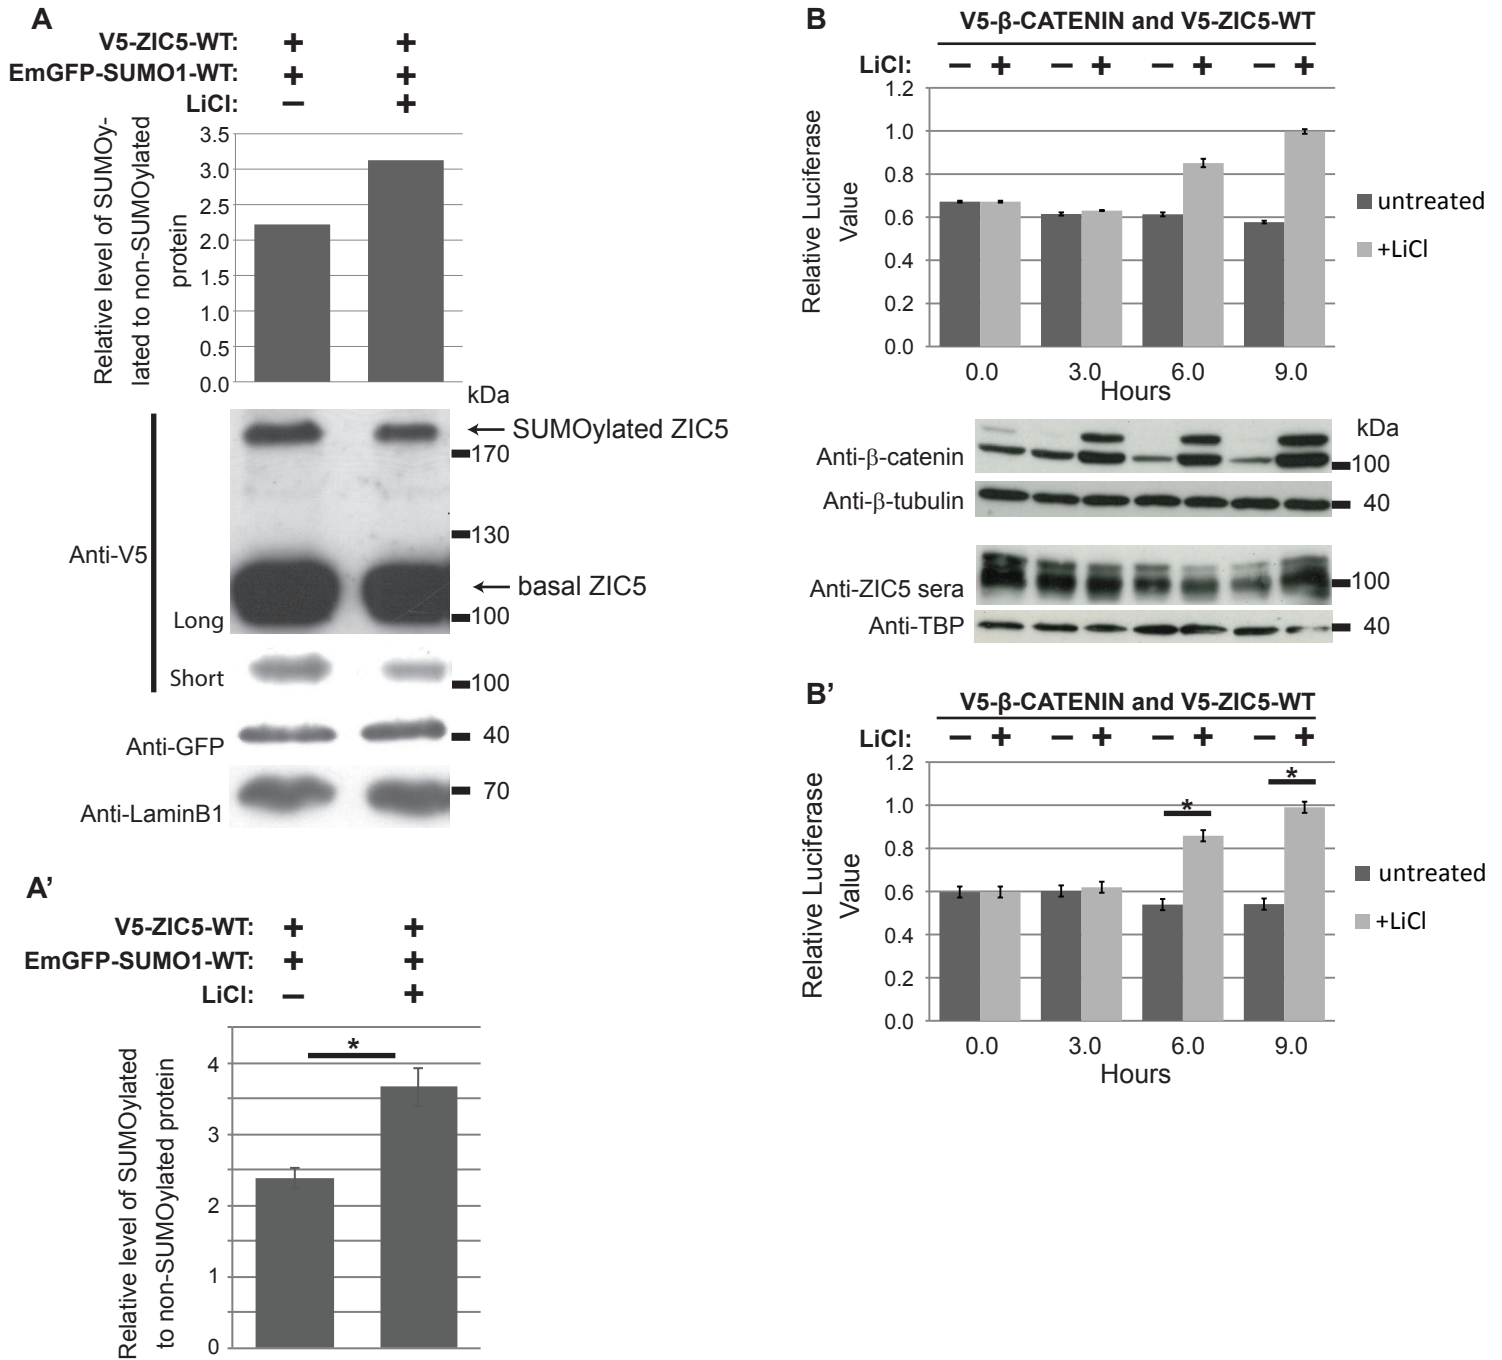

Figure 5

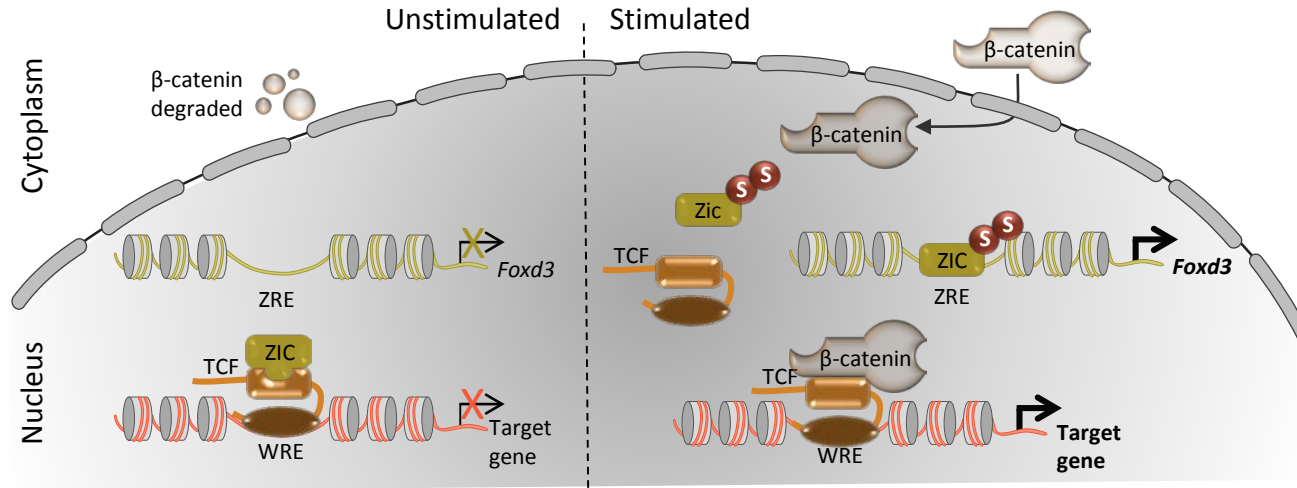

## Supplementary Figure legends

**Supplementary Figure 1: Conservation of SUMO motifs and blots illustrating SUMOylation of ZIC5 within the ZF-NC domain.** Conservation of the Motif 1 and Motif 2 consensus SUMOylation sites in ZIC proteins from a range of vertebrate species as well as *D. melanogaster* and *C. elegans*. Although most species show a high level of conservation, the consensus SUMOylation sites are missing from *C. elegans*. The first score for each motif is computed by SUMOsp and the second by SUMOplot.

**Supplementary Figure 2: ZIC5 DNA binding is required for activation of *ApoE* and *Foxd3* reporter constructs.** (A and A') Wild-type ZIC5 protein but not the SUMO-incompetent form of ZIC5 (ZIC5-C528S) is able to transactivate the *ApoE* reporter construct. (B) qRT-PCR to *ApoE* promoter fragment demonstrating enrichment of V5-ZIC5-WT but not V5-ZIC5-C528S using plasmid IP. Error bars = SD from three internal repeats. (C and C') Wild-type ZIC5 protein but not the SUMO-incompetent form of ZIC5 (ZIC5-C528S) is able to trans-activate the *Foxd3* reporter construct following co-transfection into HEK293T cells. (D) qRT-PCR to *Foxd3* promoter fragment demonstrating enrichment of V5-ZIC5-WT but not V5-ZIC5-C528S using plasmid IP. Error bars = SD from three internal repeats. (E and E') TCF7L2 does not cooperate with ZIC5 to activate *Foxd3* expression. Luciferase reporter activity in HEK293T cells to measure ZIC dependent transcription using the *Foxd3* enhancer based reporter construct. Over-expression of TCF7L2 alone or in conjunction with ZIC5 does not activate this reporter. (A, C, E) Raw data and corresponding WB of overexpressed proteins from one representative experiment. Error bars = SD from three internal repeats. (A', C', E') Pooled data from three external repeats (normalized to the background which is set to one). Error bars = SEM (ANOVA), \*:  $p < 0.01$  (A', C'), \*:  $p < 0.05$  (E') two-way ANOVA with Bonferroni multiple comparison test.

**Supplementary Figure 3: Control assays for Wnt reporter and BiFC assays.** (A and A') Specific stimulation of the TCF reporter construct in the presence of  $\beta$ -catenin. Expression constructs (V5- $\beta$ -CATENIN and V5-ZIC5-WT) were co-transfected with the TOPflash (TCF) reporter construct (Grey bars) or the FOPflash (mutant TCF) reporter construct (Black bars) into HEK293T cells and luciferase activity subsequently measured. In all cases, little stimulation of the FOPflash construct was observed. (A) Raw data and corresponding WB of overexpressed proteins from one representative experiment. Error bars = SD from three internal repeats. (A') Transformed data (normalized to the background luciferase value which is set to one) pooled from three external repeats. Error bars = SEM (ANOVA), \*:  $p < 0.01$ , two-way ANOVA with Bonferroni multiple comparison test. (B and B') The presence of non-fluorescent tagged ZIC5 (V5-ZIC5-WT) competes with the split tagged ZIC5 (V1-ZIC5-WT) in the BiFC assay. (B) Raw data and corresponding WB of overexpressed proteins from one representative experiment. Error



bars = SD from three internal repeats. (B') Transformed data (normalized to the background fluorescence value which is set to one) pooled from three external repeats. Error bars = SEM (ANOVA), \*:  $p < 0.05$ , two-way ANOVA with Bonferroni multiple comparison test.

**Supplementary Figure 4. SUMOylation does not alter ZIC5 localization or modification by Ubiquitin.**

(A-C) SUMOylation does not alter the subcellular localization of ZIC5. The relative distribution of ZIC5 protein was analysed by immunofluorescence microscopy following transfection into HEK293T cells. The ZIC5 protein was identified by hybridization with  $\alpha$ -V5 (red) and the nuclear envelope marked by  $\alpha$ -Lamin B1 (green). Representative, merged images (shown in A and B) demonstrate the predominately nuclear location of both the WT and K393R forms of ZIC5. (C) The average relative amounts of protein in the nuclear and cytoplasmic compartments calculated from quantification of WT and K393R forms of ZIC5. Graph shows pooled data from three independent experiments (at least 100 cells scored per experiment), Error bars = SED (regression analysis). The two proteins were not found to be significantly different at the  $p < 0.01$  when compared using regression analysis. (D, D') ZIC5 is ubiquitinated at a lysine other than 393. BiFC assay between Venus N-terminal (V1) labelled ZIC5 and Venus C-terminal (V2) labelled ubiquitin. The increased fluorescence indicates these proteins interact and do so in the same manner when lysine 393 is mutated, indicating that this lysine is not the modified residue. (D) One representative experiment, Error bars= SD of three internal repeats. (D') Average values from three external repeats, Error bars = SEM, \*:  $p < 0.01$ , two-way ANOVA with Bonferroni multiple comparison test.

**Supplementary Figure 5. Activation of WNT signalling increases the proportion of SUMOylated ZIC5 and  $\beta$ -catenin mediated transcription**

(A) Expanded view of the WB shown in Figure 4A. The lanes shown in Figure 4A are marked by the bar at the top of the WB. The additional two lanes show that the high molecular weight band quantified in the experiment is SUMO1-dependent. (B) The time-course of luciferase production in a TOPflash assay in the presence or absence of LiCl, from one representative experiment. Error bars = SD from two internal repeats. Based on this analysis the 1.5 hour time-point was omitted from the experiments shown in Figure 4B.

## Sup Figure 1

| SUMO conjugation motif                |                         | MOTIF 1 | Pos | Score     | MOTIF 2       | Pos | Score     |
|---------------------------------------|-------------------------|---------|-----|-----------|---------------|-----|-----------|
| Consensus sequence                    |                         | ψKXE    |     |           | ψKXE          |     |           |
| <b><i>Homo sapiens</i></b>            |                         | I KQE   |     |           |               |     |           |
| ZIC5                                  | GAFRLRYMR-----QPI       | KQE     | 393 | 3.39/0.94 | GEKPFKCEFDGC  | 522 | 0.42/0.85 |
| ZIC4                                  | GAFFRYMR-----QPI        | KQE     | 124 | 3.39/0.94 | GEKPFRCFEFEGC |     |           |
| ZIC3                                  | GAFFRYMR-----QPI        | KQE     | 248 | 3.39/0.94 | GEKPFKCEFEFGC | 359 | 0.42/0.85 |
| ZIC2                                  | GAFFRYMRQQC-----I       | KQE     | 253 | 2.73/0.94 | GEKPFQCFEFGC  |     |           |
| ZIC1                                  | GAFFRYMR-----I          | KQE     | 222 | 3.39/0.94 | GEKPFKCEFEFGC | 333 | 0.42/0.85 |
| <b><i>Mus musculus</i></b>            |                         |         |     |           |               |     |           |
| Zic5                                  | GAFRLRYMR-----QPI       | KRE     | 363 | 2.08/0.94 | GEKPFKCEFDGC  | 481 | 0.42/0.85 |
| Zic4                                  | GAFFRYMR-----QPI        | KQE     | 125 | 3.39/0.94 | GEKPFRCFEFEGC |     |           |
| Zic3                                  | GAFFRYMR-----QPI        | KQE     | 247 | 3.39/0.94 | GEKPFKCEFEFGC | 358 | 0.42/0.85 |
| Zic2                                  | GAFFRYMRQQC-----I       | KQE     | 252 | 2.73/0.94 | GEKPFQCFEFGC  |     |           |
| Zic1                                  | GAFFRYMR-----QPI        | KQE     | 222 | 3.39/0.94 | GEKPFKCEFEFGC | 333 | 0.42/0.85 |
| <b><i>Xenopus laevis</i></b>          |                         |         |     |           |               |     |           |
| zic5                                  | GAFRLRYMR-----QPI       | KQE     | 264 | 3.39/0.94 | GEKPFKCEFDGC  | 373 | 0.42/0.85 |
| zic4                                  | GAFFRYMR-----QAI        | KQE     | 281 | 4.17/0.94 | GEKPFKCEFEFGC | 390 | 0.42/0.85 |
| zic3                                  | GAFFRYMR-----QPI        | KQE     | 219 | 3.39/0.94 | GEKPFKCEFEFGC | 330 | 0.42/0.85 |
| zic2                                  | GAFFRYMRQQC-----I       | KQE     | 272 | 2.73/0.94 | GEKPFQCFEFGC  |     |           |
| zic1                                  | GAFFRYMR-----QPI        | KQE     | 218 | 3.39/0.94 | GEKPFKCEFEFGC | 329 | 0.42/0.85 |
| <b><i>Zebrafish (Danio rerio)</i></b> |                         |         |     |           |               |     |           |
| zic6                                  | DAFLCSR-----QNP         | KHE     | 216 | 0.42/0.61 | GEKPFKCEFEFGC | 326 | 0.42/0.85 |
| zic5                                  | GAFRLRYMR-----QPI       | KQE     | 246 | 3.39/0.94 | GEKPFKCEFDGC  | 355 | 0.42/0.85 |
| zic4                                  | GAFFRYMR-----QPI        | KQE     | 217 | 3.39/0.94 | GEKPFKCEFDGC  | 326 | 0.42/0.85 |
| zic3                                  | GAFFRYMR-----QPI        | KQE     | 228 | 3.39/0.94 | GEKPFKCEFDGC  | 339 | 0.42/0.85 |
| zic2a                                 | GAFFRYMRQQC-----I       | KQE     | 221 | 2.73/0.94 | GEKPFQCFEFGC  |     |           |
| zic2b                                 | GAFFRYMRQQC-----I       | KQE     | 205 | 2.73/0.94 | GEKPFQCFEFGC  |     |           |
| zic1                                  | GAFFRYMR-----QPI        | KQE     | 217 | 3.38/0.94 | GEKPFKCEFEFGC | 328 | 0.42/0.85 |
| <b><i>D. melanogaster</i></b>         |                         |         |     |           |               |     |           |
| opa                                   | GAFRLRYMRHQPASSASSV     | KQE     | 207 | 4.66/0.94 | GEKPFKCEHEGC  | 322 | 0.64/0.93 |
| <b><i>C. elegans</i></b>              |                         |         |     |           |               |     |           |
| REF2                                  | F I YPN---TLGSYG----GDK |         | 57  |           | GEKPFQCTHNGC  | 171 |           |

Supp Figure 2

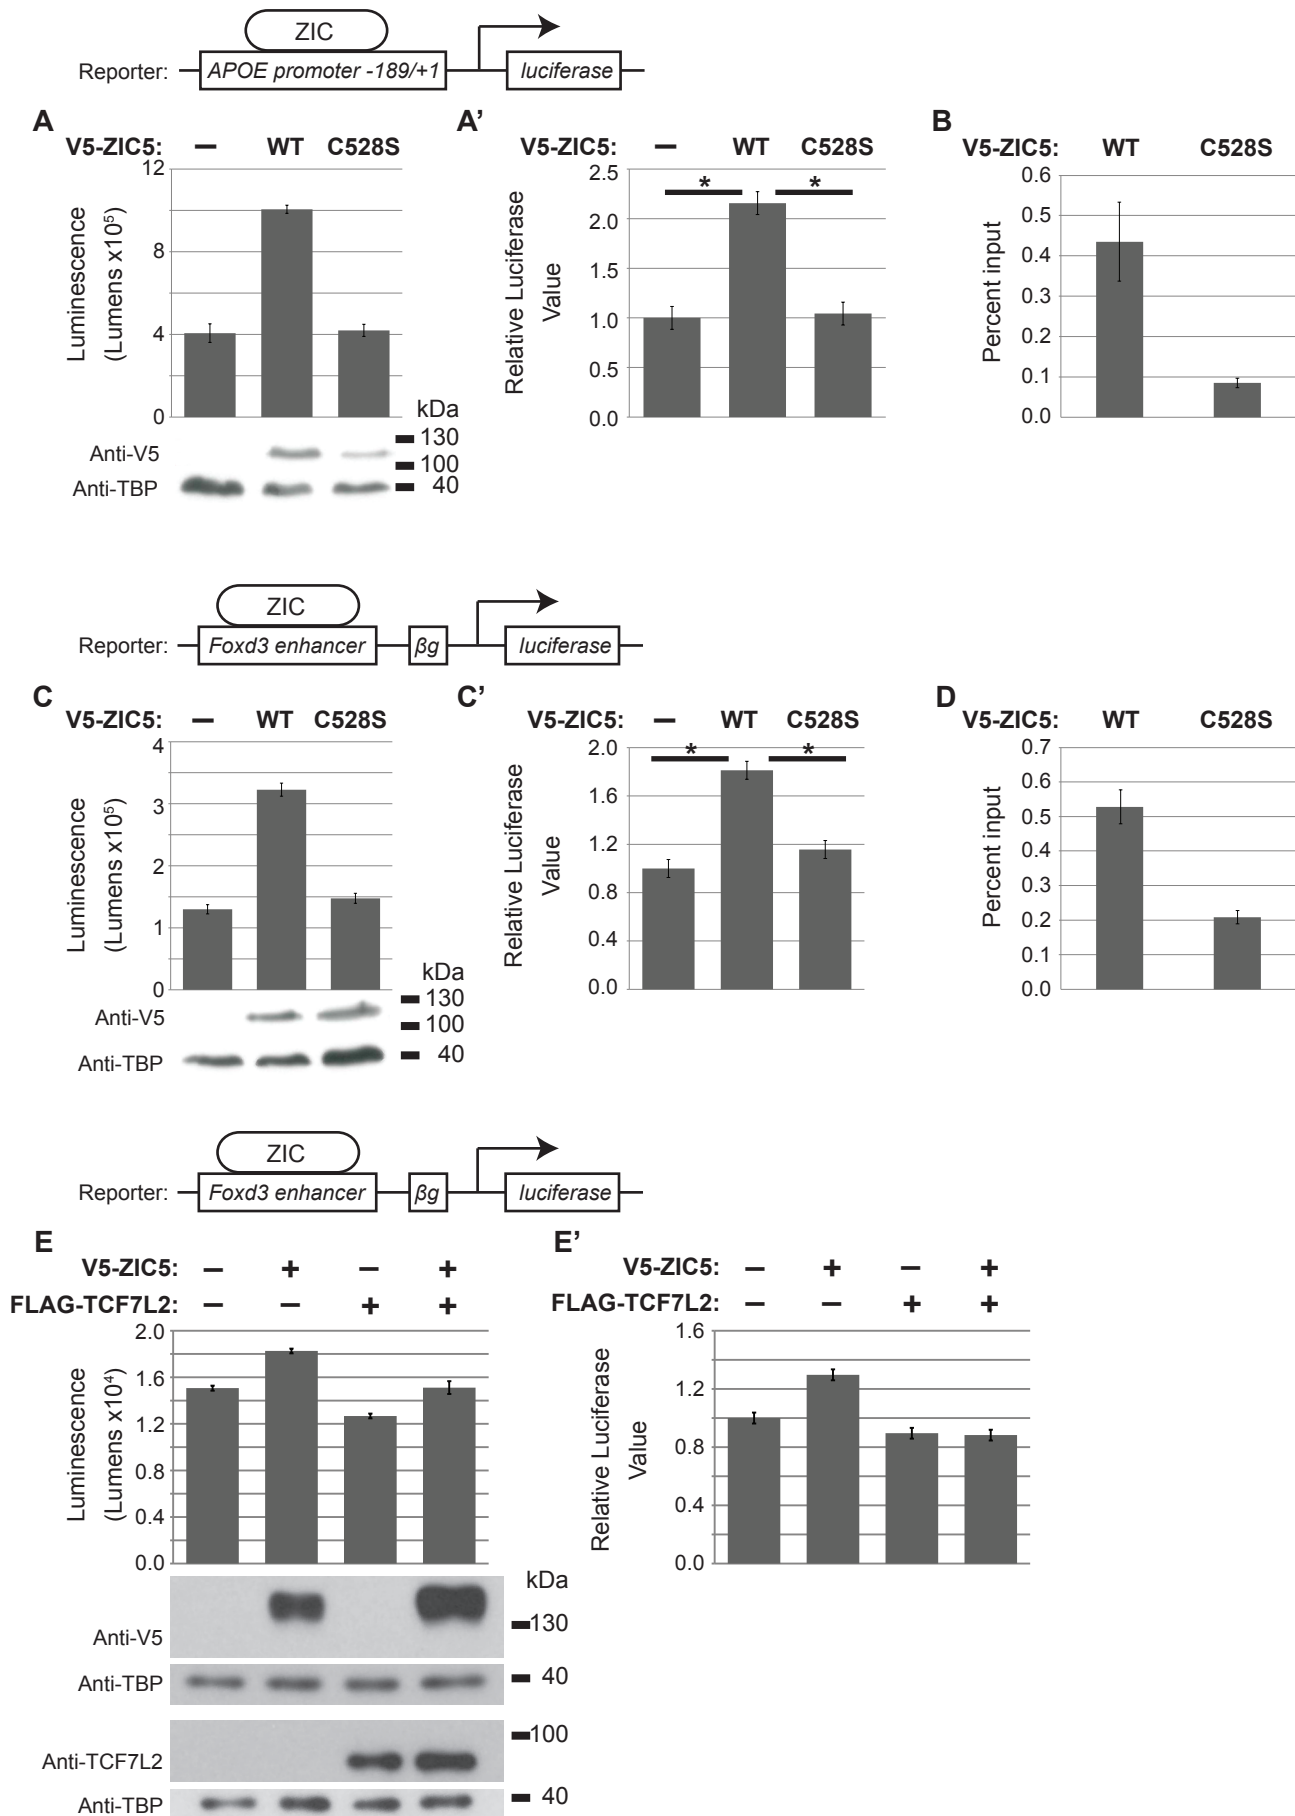

Supp Figure 3

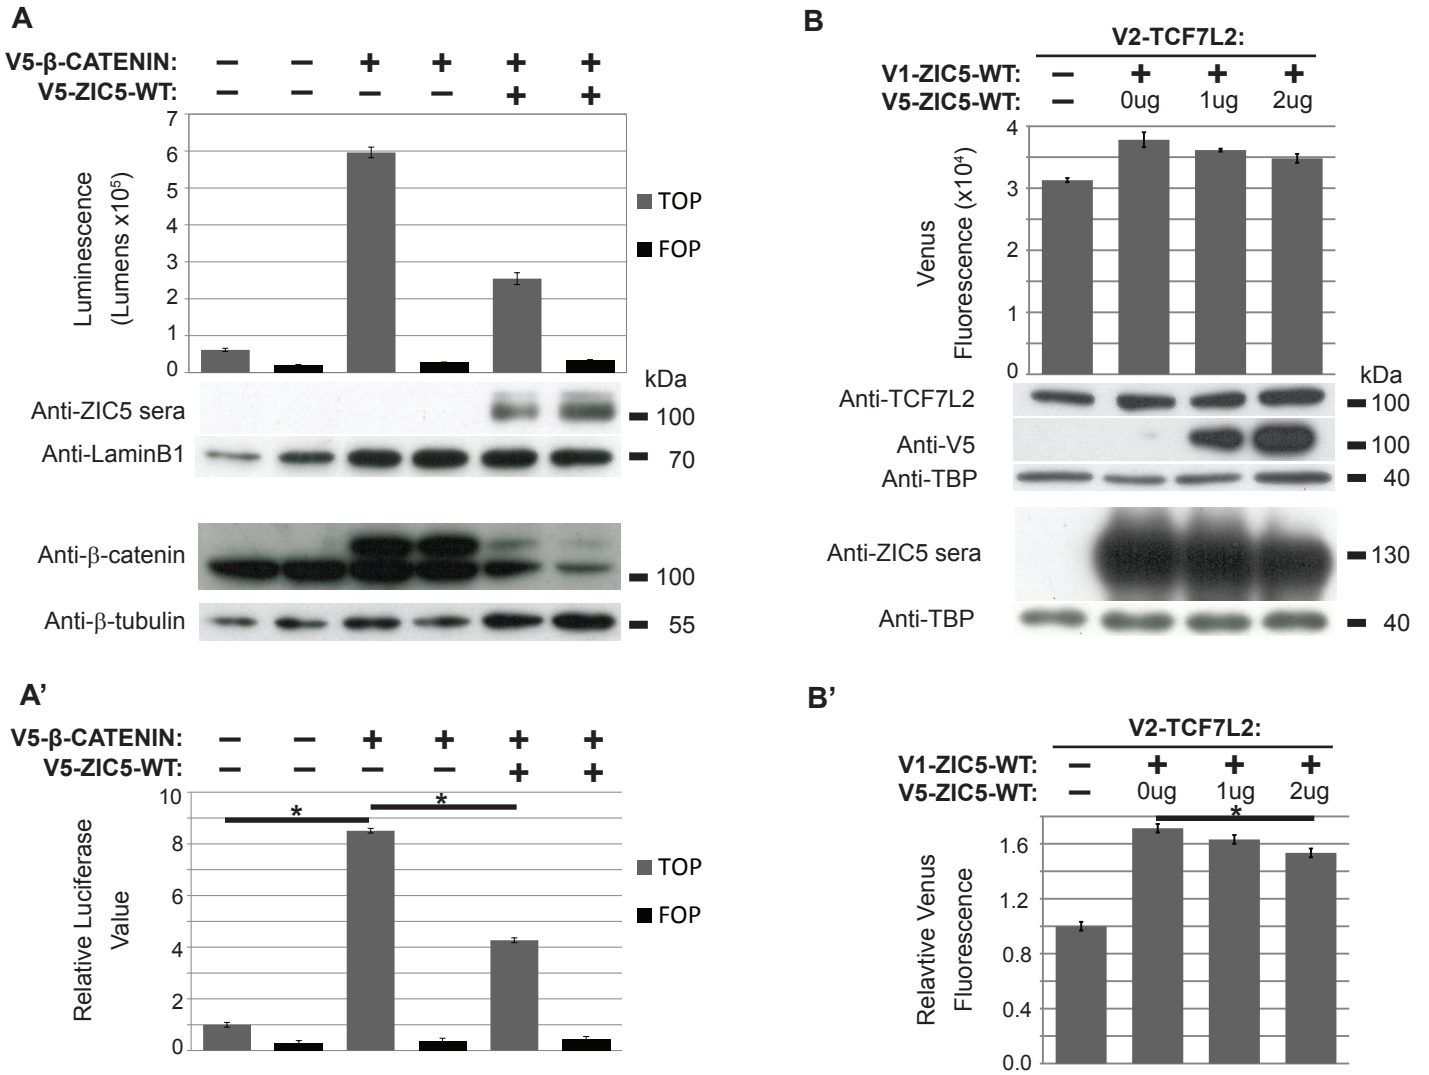

## Supp Figure 4

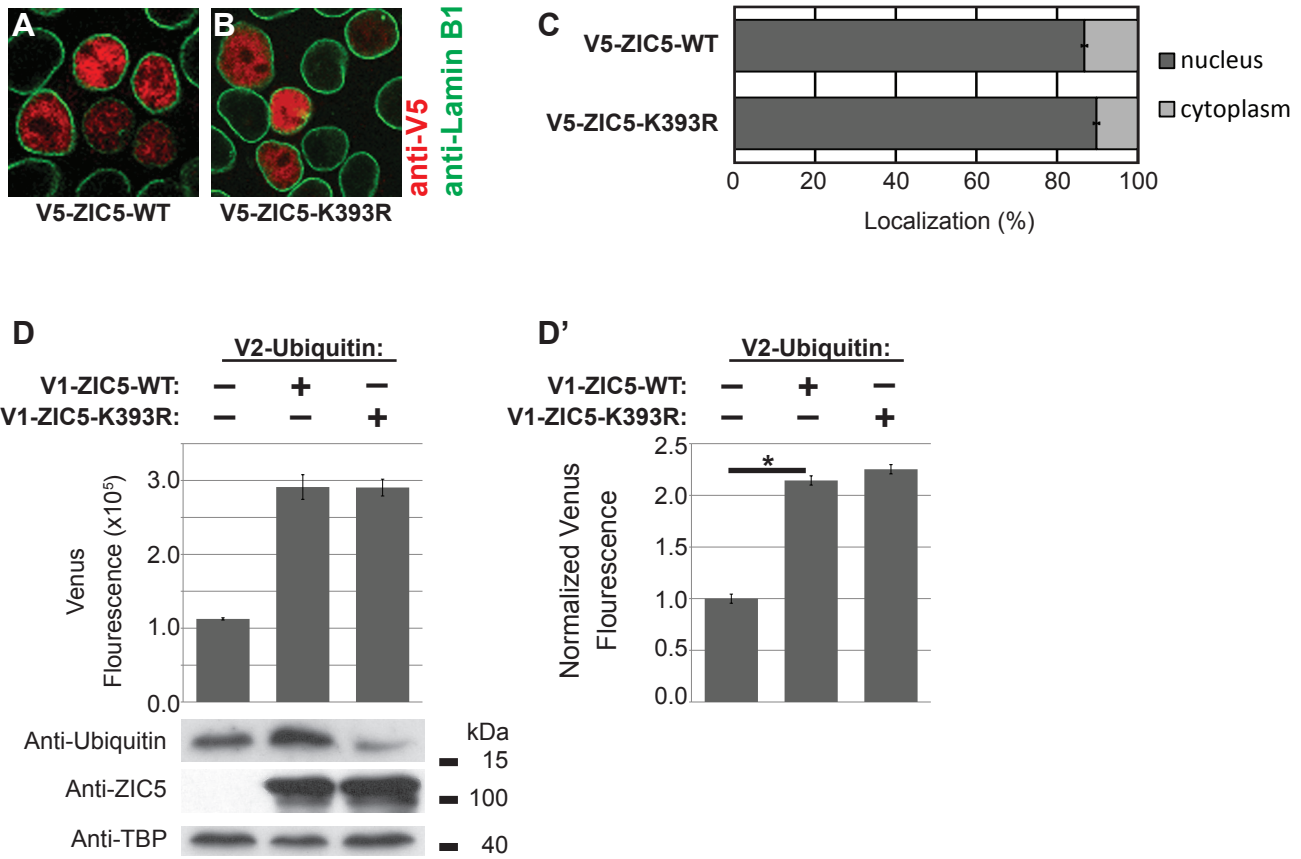

## Supp Figure 5

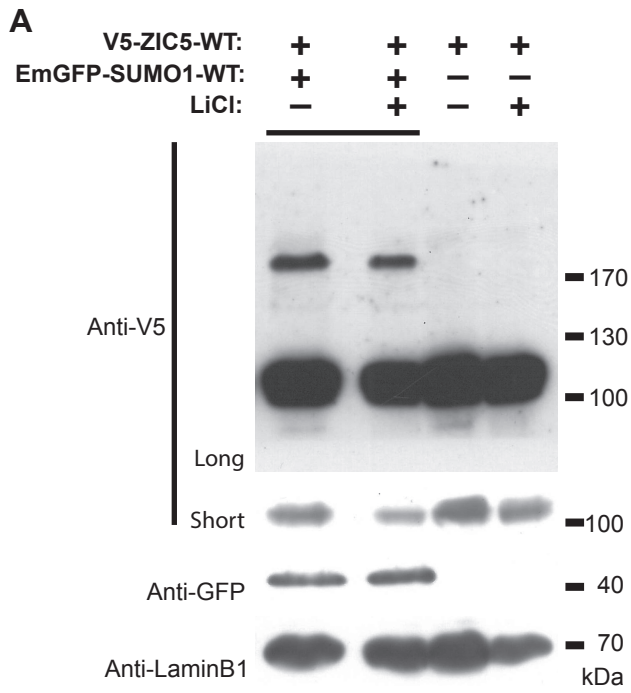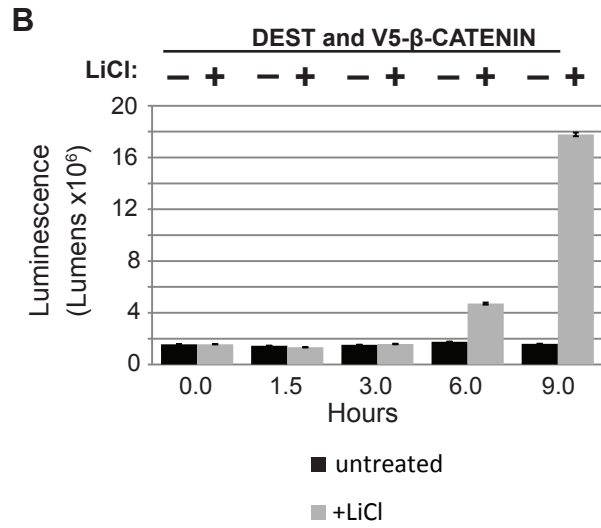

Source: https://www.biorxiv.org/content/biorxiv/early/2020/11/05/2020.11.04.369124.full.pdf
